# Supplementary material
Source: PubMed Central journal article supplement (PMC4112186)
Supplement: NIHMS590998-supplement-Supplemental_table_1.pdf [file NIHMS590998-supplement-Supplemental_table_1.pdf]

Supplemental Table 1. Expression data for 302 probe sets differentially expressed between left and right ventricles at either E6, E8, or E10.

|             |                                                                                                                                             |                         | Sample Expression Data (log2) |     |      |      |      |      |      |      |      |      |      |      |
|-------------|---------------------------------------------------------------------------------------------------------------------------------------------|-------------------------|-------------------------------|-----|------|------|------|------|------|------|------|------|------|------|
| Gene Symbol | Gene Title                                                                                                                                  | Probe Set ID            | E6                            |     | E8   |      | E10  |      | E6   |      | E8   |      | E10  |      |
|             |                                                                                                                                             |                         | LVa                           | LVb | LVa  | LVb  | LVa  | LVb  | RVa  | RVb  | RVa  | RVb  | RVa  | RVb  |
| TNIP1       | TNFAIP3 interacting protein 1                                                                                                               | Gga.4954.2.S1_a_at      | 5.0                           | 5.5 | 6.9  | 6.9  | 8.8  | 8.8  | 8.8  | 8.8  | 6.4  | 6.8  | 6.6  | 6.1  |
| SLCO2B1     | solute carrier organic anion transporter family, member 2B1                                                                                 | Gga.1783.1.S1_at        | 3.4                           | 3.5 | 6.1  | 6.1  | 6.7  | 6.9  | 5.6  | 5.9  | 6.5  | 6.3  | 6.5  | 6.0  |
| ---         | ---                                                                                                                                         | GgaAffx.20450.1.S1_at   | 6.9                           | 6.6 | 9.6  | 9.5  | 9.6  | 9.7  | 8.9  | 8.9  | 9.4  | 9.4  | 9.3  | 9.2  |
| ZNF238      | zinc finger protein 238                                                                                                                     | GgaAffx.6764.1.S1_at    | 5.5                           | 5.7 | 7.9  | 7.9  | 8.0  | 8.0  | 7.8  | 7.8  | 8.0  | 8.0  | 8.0  | 7.9  |
| EGFL6       | EGF-like-domain, multiple 6                                                                                                                 | Gga.11105.1.S1_a_at     | 6.2                           | 6.1 | 7.9  | 7.4  | 9.2  | 9.1  | 9.1  | 9.1  | 9.8  | 9.7  | 9.4  | 9.3  |
| HTRA3       | HtrA serine peptidase 3                                                                                                                     | Gga.5710.1.S1_a_at      | 3.6                           | 3.8 | 5.9  | 5.6  | 7.0  | 7.0  | 6.7  | 6.8  | 7.1  | 6.7  | 6.3  | 6.4  |
| HTRA3       | HtrA serine peptidase 3                                                                                                                     | Gga.5710.2.S1_a_at      | 6.2                           | 5.8 | 8.4  | 8.1  | 9.3  | 9.3  | 9.5  | 9.0  | 9.4  | 9.2  | 8.8  | 8.8  |
| RHOB        | ras homolog gene family, member B                                                                                                           | Gga.3852.1.S1_at        | 4.5                           | 4.0 | 7.2  | 7.4  | 6.5  | 6.7  | 6.9  | 6.7  | 6.4  | 6.4  | 5.3  | 5.4  |
| HYAL2       | hyaluronoglucosaminidase 2                                                                                                                  | GgaAffx.1417.1.S1_at    | 3.8                           | 3.5 | 5.7  | 5.9  | 5.6  | 5.8  | 6.9  | 6.6  | 6.1  | 5.7  | 4.2  | 4.9  |
| ---         | ---                                                                                                                                         | Gga.12285.1.S1_at       | 4.9                           | 4.7 | 6.3  | 6.1  | 4.1  | 3.8  | 3.9  | 4.3  | 5.8  | 4.6  | 7.0  | 7.1  |
| ATP2B4      | ATPase, Ca++ transporting, plasma membrane 4                                                                                                | Gga.10113.1.S1_s_at     | 3.6                           | 3.7 | 5.4  | 5.6  | 3.6  | 3.2  | 4.1  | 4.4  | 5.3  | 4.8  | 5.5  | 5.4  |
| OSTN        | osteocrin                                                                                                                                   | Gga.13448.1.S1_at       | 5.3                           | 4.9 | 8.5  | 8.7  | 5.7  | 6.0  | 5.4  | 5.1  | 8.5  | 8.5  | 9.0  | 8.9  |
| USP24       | ubiquitin specific peptidase 24                                                                                                             | GgaAffx.6837.1.S1_at    | 6.8                           | 7.0 | 5.9  | 6.0  | 5.5  | 5.5  | 6.1  | 6.3  | 6.5  | 6.8  | 7.7  | 7.6  |
| ---         | ---                                                                                                                                         | Gga.1611.1.A1_at        | 4.7                           | 4.9 | 4.6  | 4.2  | 3.9  | 3.6  | 4.8  | 4.8  | 5.0  | 5.1  | 6.1  | 6.3  |
| LOC427447   | similar to rapamycin insensitive companion of mTOR; rictor                                                                                  | GgaAffx.25975.1.S1_at   | 3.6                           | 3.5 | 2.7  | 2.7  | 2.6  | 2.2  | 3.3  | 2.8  | 3.8  | 4.2  | 4.8  | 5.2  |
| TMEM16F     | transmembrane protein 16F                                                                                                                   | Gga.14889.1.S1_s_at     | 3.2                           | 3.2 | 3.3  | 3.9  | 3.6  | 3.6  | 3.2  | 2.9  | 3.4  | 4.0  | 6.2  | 5.8  |
| FGL2        | fibrinogen-like 2                                                                                                                           | GgaAffx.5247.1.S1_at    | 2.6                           | 2.6 | 2.7  | 2.8  | 2.8  | 3.2  | 2.6  | 2.6  | 3.7  | 3.7  | 5.5  | 6.0  |
| ---         | ---                                                                                                                                         | GgaAffx.8575.1.S1_at    | 2.0                           | 2.0 | 2.1  | 2.2  | 2.0  | 2.0  | 2.1  | 2.9  | 3.4  | 3.6  | 4.3  | 4.3  |
| PPAPDC1A    | phosphatidic acid phosphatase type 2 domain containing 1A                                                                                   | GgaAffx.5964.1.S1_at    | 4.3                           | 4.5 | 4.3  | 4.3  | 4.3  | 4.3  | 4.6  | 4.4  | 5.1  | 5.3  | 6.3  | 6.6  |
| ---         | ---                                                                                                                                         | Gga.12680.1.S1_at       | 7.6                           | 7.4 | 7.6  | 7.6  | 7.3  | 7.3  | 8.1  | 8.0  | 8.0  | 8.0  | 9.5  | 9.4  |
| STMN2       | stathmin-like 2                                                                                                                             | Gga.1585.1.S2_at        | 2.8                           | 2.4 | 2.3  | 2.3  | 2.4  | 2.9  | 4.1  | 4.1  | 3.6  | 4.2  | 8.1  | 7.8  |
| EFEMP1      | EGF-containing fibulin-like extracellular matrix protein 1                                                                                  | Gga.5255.1.S1_at        | 8.7                           | 8.4 | 9.2  | 9.2  | 9.3  | 9.3  | 10.9 | 10.9 | 11.0 | 11.1 | 10.3 | 10.3 |
| ---         | ---                                                                                                                                         | AY013303.CDS3.S1_s_at   | 4.2                           | 4.2 | 6.7  | 6.6  | 4.6  | 4.7  | 6.9  | 6.8  | 8.4  | 7.9  | 8.1  | 7.4  |
| LOC415891   | Hypothetical LOC415891                                                                                                                      | Gga.2288.1.A1_at        | 2.6                           | 2.9 | 3.9  | 4.1  | 4.2  | 4.2  | 4.9  | 5.1  | 5.1  | 4.8  | 5.1  | 4.9  |
| ---         | ---                                                                                                                                         | AY013303.CDS2.S1_s_at   | 3.7                           | 4.2 | 5.7  | 6.2  | 5.1  | 5.3  | 7.6  | 7.6  | 7.8  | 7.8  | 8.2  | 8.2  |
| ---         | ---                                                                                                                                         | AY013303.CDS1.S1_s_at   | 10.0                          | 9.9 | 11.8 | 11.8 | 11.2 | 11.3 | 12.2 | 12.2 | 12.5 | 12.5 | 12.9 | 12.7 |
| LOC770705   | Similar to pol                                                                                                                              | Gga.19447.2.S1_s_at     | 8.7                           | 8.7 | 10.5 | 10.5 | 9.9  | 10.0 | 11.3 | 11.2 | 11.4 | 11.4 | 11.5 | 11.5 |
| FGF14       | fibroblast growth factor 14                                                                                                                 | Gga.302.2.S1_a_at       | 2.7                           | 2.8 | 4.1  | 2.8  | 2.7  | 2.8  | 5.6  | 5.0  | 4.3  | 4.6  | 6.1  | 5.9  |
| NBAS        | neuroblastoma amplified sequence                                                                                                            | Gga.18452.1.S1_s_at     | 3.9                           | 3.3 | 3.2  | 3.1  | 2.6  | 2.5  | 6.2  | 5.8  | 4.6  | 4.6  | 5.8  | 4.8  |
| ---         | ---                                                                                                                                         | Gga.18708.1.S1_at       | 4.9                           | 3.9 | 4.8  | 4.8  | 4.7  | 5.5  | 8.3  | 8.4  | 7.3  | 7.4  | 8.5  | 8.2  |
| ---         | ---                                                                                                                                         | GgaAffx.21173.1.S1_at   | 2.9                           | 2.3 | 2.3  | 2.4  | 2.3  | 2.3  | 5.0  | 5.1  | 4.3  | 5.2  | 5.6  | 5.1  |
| ---         | ---                                                                                                                                         | Gga.19737.1.S1_at       | 3.8                           | 3.5 | 3.9  | 3.9  | 4.9  | 5.0  | 6.1  | 5.5  | 4.9  | 5.3  | 7.0  | 7.2  |
| ZPLD1       | zona pellucida-like domain containing 1                                                                                                     | GgaAffx.24657.1.S1_at   | 2.4                           | 2.5 | 2.5  | 2.5  | 2.5  | 2.5  | 5.1  | 4.1  | 3.0  | 2.5  | 5.3  | 5.1  |
| PLB1        | phospholipase B1                                                                                                                            | GgaAffx.6308.3.S1_s_at  | 6.7                           | 7.1 | 7.2  | 7.3  | 9.4  | 9.3  | 9.0  | 8.9  | 9.9  | 10.0 | 10.8 | 10.8 |
| SOD3        | superoxide dismutase 3, extracellular                                                                                                       | Gga.1128.2.S1_a_at      | 7.6                           | 7.4 | 9.0  | 9.2  | 9.0  | 9.1  | 9.5  | 9.6  | 11.0 | 11.0 | 11.0 | 11.1 |
| CCDC3       | coiled-coil domain containing 3                                                                                                             | Gga.15383.1.S1_at       | 5.8                           | 5.3 | 7.8  | 7.8  | 8.6  | 8.5  | 7.7  | 7.5  | 10.4 | 10.5 | 10.5 | 10.4 |
| LOC421447   | similar to Ephx1 protein                                                                                                                    | Gga.7212.1.S1_at        | 4.8                           | 4.4 | 4.6  | 4.8  | 5.7  | 5.4  | 5.1  | 5.3  | 6.8  | 7.0  | 6.8  | 6.3  |
| CRHBP       | corticotropin releasing hormone binding protein                                                                                             | Gga.12383.1.S1_at       | 5.4                           | 5.7 | 5.9  | 5.3  | 6.5  | 6.7  | 6.2  | 6.3  | 8.3  | 8.0  | 8.6  | 8.7  |
| MMRN1       | multimerin 1                                                                                                                                | GgaAffx.6568.1.S1_at    | 2.2                           | 2.2 | 2.2  | 2.1  | 3.0  | 4.3  | 2.1  | 2.1  | 5.4  | 5.5  | 7.0  | 6.8  |
| ---         | ---                                                                                                                                         | GgaAffx.9592.1.S1_x_at  | 3.3                           | 3.3 | 3.4  | 3.3  | 3.4  | 3.5  | 3.2  | 3.1  | 5.3  | 5.6  | 4.8  | 5.8  |
| RXFP1       | relaxin/insulin-like family peptide receptor 1                                                                                              | GgaAffx.5945.1.S1_at    | 2.4                           | 2.3 | 3.3  | 3.5  | 3.9  | 3.7  | 2.6  | 2.1  | 5.5  | 5.9  | 5.8  | 5.5  |
| PLXNA4B     | plexin A4, B                                                                                                                                | GgaAffx.4035.1.S1_at    | 3.5                           | 3.3 | 4.7  | 4.5  | 4.0  | 3.9  | 3.5  | 3.8  | 5.7  | 6.2  | 6.4  | 6.4  |
| SEMA5A      | sema domain, seven thrombospondin repeats (type 1 and type 1-like), transmembrane domain (TM) and short cytoplasmic domain, (semaphorin) 5A | GgaAffx.24100.1.S1_s_at | 6.6                           | 6.7 | 6.1  | 6.3  | 7.5  | 7.2  | 6.9  | 6.9  | 8.1  | 8.3  | 7.3  | 7.4  |
| ADAMTSL3    | ADAMTS-like 3                                                                                                                               | GgaAffx.26747.1.S1_s_at | 5.4                           | 5.3 | 4.9  | 5.4  | 6.3  | 6.1  | 6.0  | 5.4  | 7.9  | 7.9  | 6.5  | 6.4  |
| GDF10       | growth differentiation factor 10                                                                                                            | GgaAffx.3720.1.S1_at    | 2.5                           | 2.5 | 2.5  | 2.5  | 2.5  | 2.5  | 2.8  | 2.7  | 7.1  | 6.5  | 4.0  | 4.3  |

|                       |                                                                                                                                                                                                                   |                         |      |      |      |      |     |     |      |      |      |      |      |      |
|-----------------------|-------------------------------------------------------------------------------------------------------------------------------------------------------------------------------------------------------------------|-------------------------|------|------|------|------|-----|-----|------|------|------|------|------|------|
| ABI3BP                | ABI gene family, member 3 (NESH) binding protein                                                                                                                                                                  | GgaAffx.9757.3.S1_s_at  | 3.4  | 3.6  | 4.0  | 4.0  | 3.2 | 2.9 | 4.5  | 4.4  | 6.1  | 6.4  | 3.6  | 3.8  |
| ---                   | ---                                                                                                                                                                                                               | Gga.11887.1.S1_at       | 3.8  | 3.7  | 3.9  | 3.7  | 3.3 | 3.0 | 4.7  | 3.7  | 5.9  | 6.1  | 5.3  | 4.4  |
| FBLN5                 | fibulin 5                                                                                                                                                                                                         | Gga.10096.1.S1_at       | 5.9  | 5.4  | 6.3  | 6.1  | 5.8 | 5.2 | 8.1  | 8.1  | 9.0  | 9.0  | 7.2  | 7.2  |
| ---                   | ---                                                                                                                                                                                                               | Gga.13086.1.S1_at       | 6.3  | 6.1  | 6.5  | 6.4  | 6.5 | 6.2 | 7.5  | 7.5  | 9.0  | 9.0  | 7.5  | 7.5  |
| F13A1                 | coagulation factor XIII, A1 polypeptide                                                                                                                                                                           | Gga.226.1.S1_at         | 2.6  | 2.6  | 2.7  | 2.6  | 2.7 | 2.7 | 3.7  | 3.5  | 4.7  | 4.9  | 3.9  | 3.7  |
| NPY                   | neuropeptide Y                                                                                                                                                                                                    | Gga.837.1.S1_a_at       | 6.5  | 6.3  | 6.6  | 6.1  | 5.5 | 4.9 | 7.8  | 7.9  | 9.5  | 9.6  | 7.8  | 7.4  |
| PROKR2                | prokineticin receptor 2                                                                                                                                                                                           | GgaAffx.22678.1.S1_at   | 4.6  | 4.3  | 3.6  | 3.4  | 2.5 | 2.9 | 5.8  | 5.8  | 8.1  | 8.2  | 5.9  | 6.3  |
| SLC9A9                | solute carrier family 9 (sodium/hydrogen exchanger), member 9                                                                                                                                                     | GgaAffx.1584.2.S1_s_at  | 5.0  | 3.8  | 2.9  | 3.3  | 3.7 | 3.4 | 4.8  | 4.7  | 5.1  | 5.5  | 5.5  | 4.9  |
| NOV                   | nephroblastoma overexpressed gene                                                                                                                                                                                 | Gga.2587.1.S1_at        | 5.4  | 5.6  | 3.7  | 3.6  | 4.5 | 4.8 | 5.0  | 5.1  | 7.0  | 6.8  | 6.7  | 6.5  |
| DCX                   | doublecortex                                                                                                                                                                                                      | Gga.2608.1.S1_at        | 8.2  | 7.8  | 7.3  | 7.5  | 7.8 | 7.7 | 8.9  | 9.0  | 9.4  | 9.4  | 9.1  | 9.1  |
| CSF1R                 | colony stimulating factor 1 receptor, formerly McDonough feline sarcoma viral (v-fms) oncogene homolog                                                                                                            | GgaAffx.26579.1.S1_s_at | 5.9  | 5.6  | 5.1  | 5.2  | 5.8 | 5.8 | 6.6  | 6.7  | 7.2  | 7.3  | 6.6  | 6.5  |
| ---                   | ---                                                                                                                                                                                                               | Gga.19752.1.S1_at       | 4.1  | 5.2  | 3.8  | 3.5  | 4.8 | 5.2 | 6.0  | 6.0  | 7.4  | 7.3  | 6.7  | 7.0  |
| PDE1C                 | phosphodiesterase 1C, calmodulin-dependent 70kDa                                                                                                                                                                  | GgaAffx.7745.3.S1_s_at  | 5.9  | 6.1  | 5.0  | 5.0  | 5.2 | 5.6 | 6.9  | 7.0  | 7.7  | 7.8  | 8.1  | 8.0  |
| ---                   | ---                                                                                                                                                                                                               | GgaAffx.20200.1.S1_at   | 4.0  | 3.5  | 3.9  | 3.9  | 4.2 | 4.0 | 5.8  | 5.4  | 7.0  | 6.7  | 6.8  | 6.8  |
| SERPINF1 /// SERPINF2 | serpin peptidase inhibitor, clade F (alpha-2 antiplasmin, pigment epithelium derived factor), member 1 /// serpin peptidase inhibitor, clade F (alpha-2 antiplasmin, pigment epithelium derived factor), member 2 | Gga.11614.1.S1_at       | 7.9  | 7.8  | 7.7  | 7.5  | 8.2 | 8.2 | 8.7  | 8.8  | 9.6  | 9.6  | 9.7  | 9.6  |
| RASD2                 | RASD family, member 2                                                                                                                                                                                             | Gga.11996.1.S1_at       | 8.1  | 7.8  | 7.1  | 7.3  | 8.4 | 8.3 | 9.2  | 9.3  | 9.8  | 9.7  | 9.9  | 10.0 |
| MYH11                 | myosin, heavy chain 11, smooth muscle                                                                                                                                                                             | Gga.3225.1.S1_at        | 10.0 | 9.9  | 4.7  | 4.9  | 4.9 | 4.8 | 9.5  | 9.5  | 6.5  | 7.0  | 7.1  | 7.3  |
| CPNE4                 | copine IV                                                                                                                                                                                                         | GgaAffx.21303.1.S1_at   | 4.8  | 5.1  | 4.3  | 4.6  | 2.7 | 3.6 | 6.3  | 6.4  | 6.7  | 6.5  | 5.0  | 4.8  |
| ---                   | ---                                                                                                                                                                                                               | Gga.19427.1.S1_at       | 4.6  | 4.5  | 3.3  | 3.3  | 2.7 | 2.7 | 5.2  | 4.8  | 5.6  | 5.6  | 3.1  | 3.2  |
| LOC771622             | Similar to Potassium voltage-gated channel, subfamily H (eag-related), member 7                                                                                                                                   | Gga.11295.1.S1_at       | 8.1  | 8.1  | 4.9  | 4.4  | 4.4 | 4.4 | 7.3  | 7.2  | 7.8  | 7.8  | 6.9  | 6.9  |
| ADCY2                 | adenylate cyclase 2 (brain)                                                                                                                                                                                       | GgaAffx.8289.3.S1_s_at  | 7.2  | 7.1  | 4.6  | 4.3  | 4.0 | 3.9 | 6.7  | 6.9  | 6.5  | 6.6  | 6.0  | 5.5  |
| ---                   | ---                                                                                                                                                                                                               | Gga.13827.1.S1_at       | 7.8  | 7.6  | 4.5  | 4.6  | 3.2 | 4.5 | 7.6  | 7.0  | 7.4  | 7.2  | 5.8  | 5.1  |
| TRMT6                 | tRNA methyltransferase 6 homolog (S. cerevisiae)                                                                                                                                                                  | GgaAffx.12535.1.S1_at   | 4.3  | 4.3  | 3.0  | 2.8  | 2.0 | 2.4 | 5.2  | 5.0  | 5.2  | 5.0  | 4.3  | 3.3  |
| MSX2                  | msh homeobox 2                                                                                                                                                                                                    | Gga.4977.1.S1_at        | 7.4  | 7.5  | 4.4  | 4.0  | 4.0 | 3.9 | 7.5  | 7.4  | 7.1  | 7.0  | 5.1  | 5.6  |
| MYO16                 | myosin XVI                                                                                                                                                                                                        | GgaAffx.25088.2.S1_at   | 6.7  | 6.6  | 4.3  | 4.0  | 3.7 | 3.4 | 7.1  | 7.0  | 6.2  | 6.1  | 4.6  | 4.8  |
| PRRX1                 | paired related homeobox 1                                                                                                                                                                                         | Gga.1546.1.S1_at        | 6.3  | 6.7  | 4.3  | 4.2  | 3.6 | 3.6 | 7.5  | 7.6  | 7.3  | 7.2  | 5.0  | 4.8  |
| ---                   | ---                                                                                                                                                                                                               | Gga.15285.1.S1_at       | 7.1  | 7.0  | 4.5  | 4.1  | 3.4 | 3.4 | 8.7  | 8.6  | 7.1  | 7.0  | 5.7  | 5.1  |
| RSPO3                 | R-spondin 3 homolog (Xenopus laevis)                                                                                                                                                                              | Gga.1605.1.S1_s_at      | 7.2  | 7.2  | 4.0  | 4.4  | 3.3 | 3.3 | 7.8  | 7.9  | 7.1  | 7.2  | 6.1  | 5.7  |
| TMEM132C              | transmembrane protein 132C                                                                                                                                                                                        | GgaAffx.1771.1.S1_s_at  | 8.5  | 8.4  | 6.0  | 5.9  | 4.0 | 4.8 | 9.3  | 9.5  | 8.6  | 8.6  | 7.4  | 6.9  |
| ---                   | ---                                                                                                                                                                                                               | Gga.1542.1.S1_at        | 11.2 | 11.2 | 9.3  | 9.2  | 8.3 | 8.2 | 11.8 | 11.7 | 11.6 | 11.7 | 10.0 | 9.9  |
| RSPO3                 | R-spondin 3 homolog (Xenopus laevis)                                                                                                                                                                              | Gga.19305.1.S1_at       | 10.9 | 10.8 | 8.4  | 8.2  | 6.3 | 6.2 | 11.7 | 11.6 | 10.8 | 10.9 | 8.9  | 9.1  |
| AHNAK2                | AHNAK nucleoprotein 2                                                                                                                                                                                             | GgaAffx.23623.1.S1_s_at | 8.7  | 8.9  | 7.2  | 7.6  | 5.3 | 5.2 | 9.0  | 8.9  | 8.2  | 8.2  | 7.6  | 7.5  |
| WNT11                 | wingless-type MMTV integration site family, member 11                                                                                                                                                             | Gga.306.1.S1_at         | 9.4  | 9.3  | 7.3  | 7.1  | 4.8 | 4.6 | 8.8  | 8.7  | 8.4  | 8.3  | 6.9  | 7.0  |
| BMP10                 | bone morphogenetic protein 10                                                                                                                                                                                     | Gga.9509.1.S1_at        | 13.3 | 13.3 | 11.7 | 11.7 | 9.1 | 8.9 | 13.0 | 13.1 | 12.5 | 12.5 | 11.3 | 11.2 |
| APCDD1                | adenomatosis polyposis coli down-regulated 1                                                                                                                                                                      | Gga.18979.1.S1_at       | 7.2  | 6.8  | 5.9  | 5.8  | 3.2 | 2.7 | 7.5  | 7.5  | 8.1  | 8.0  | 6.4  | 6.2  |
| APCDD1                | adenomatosis polyposis coli down-regulated 1                                                                                                                                                                      | Gga.2301.1.S1_at        | 9.3  | 9.3  | 8.5  | 8.6  | 6.5 | 6.1 | 9.8  | 9.8  | 10.3 | 10.2 | 8.7  | 8.8  |
| MAB21L2               | mab-21-like 2 (C. elegans)                                                                                                                                                                                        | Gga.2038.1.S1_at        | 8.6  | 8.5  | 7.4  | 7.5  | 4.1 | 5.0 | 9.7  | 9.8  | 9.6  | 9.7  | 8.0  | 7.8  |
| COL9A3                | collagen, type IX, alpha 3                                                                                                                                                                                        | Gga.3459.1.S1_at        | 8.9  | 9.1  | 7.8  | 7.8  | 4.6 | 3.8 | 10.6 | 10.6 | 10.1 | 10.0 | 8.0  | 7.8  |
| COL9A3                | collagen, type IX, alpha 3                                                                                                                                                                                        | Gga.3459.1.S2_at        | 10.3 | 10.2 | 9.1  | 9.2  | 6.3 | 6.6 | 11.9 | 11.9 | 11.3 | 11.5 | 9.2  | 9.1  |
| CHODL                 | chondrolectin                                                                                                                                                                                                     | Gga.9667.1.S1_a_at      | 12.0 | 12.1 | 9.5  | 9.7  | 5.4 | 6.2 | 13.5 | 13.4 | 12.5 | 12.6 | 9.6  | 9.6  |
| CHODL                 | chondrolectin                                                                                                                                                                                                     | Gga.9667.1.S1_s_at      | 13.1 | 13.1 | 10.9 | 11.1 | 6.2 | 6.3 | 14.3 | 14.3 | 13.7 | 13.7 | 11.0 | 10.7 |
| KCNH7                 | potassium voltage-gated channel, subfamily H (eag-related), member 7                                                                                                                                              | Gga.13027.1.S1_at       | 7.2  | 7.3  | 4.7  | 4.7  | 3.0 | 3.9 | 6.9  | 6.7  | 7.5  | 7.6  | 7.1  | 7.1  |
| KCNH7                 | potassium voltage-gated channel, subfamily H (eag-related), member 7                                                                                                                                              | GgaAffx.23446.1.S1_at   | 6.9  | 6.8  | 3.1  | 3.5  | 2.3 | 2.4 | 5.9  | 6.0  | 7.4  | 7.3  | 6.3  | 6.8  |

|           |                                                                                           |                         |      |      |      |      |     |     |      |      |      |      |      |      |
|-----------|-------------------------------------------------------------------------------------------|-------------------------|------|------|------|------|-----|-----|------|------|------|------|------|------|
| KCNH7     | potassium voltage-gated channel, subfamily H (eag-related), member 7                      | GgaAffx.7025.1.S1_s_at  | 7.0  | 7.2  | 2.9  | 3.5  | 2.2 | 2.2 | 6.6  | 6.5  | 7.5  | 7.4  | 6.7  | 6.9  |
| ---       | ---                                                                                       | Gga.19926.1.S1_at       | 5.2  | 5.8  | 4.2  | 4.2  | 4.6 | 4.5 | 5.9  | 6.1  | 6.8  | 6.4  | 5.8  | 5.7  |
| ---       | ---                                                                                       | Gga.18078.1.S1_at       | 8.1  | 8.1  | 5.9  | 5.1  | 6.6 | 6.7 | 8.6  | 8.5  | 9.2  | 9.3  | 8.7  | 8.6  |
| LOC428272 | similar to pepsinogen C                                                                   | GgaAffx.25860.1.S1_at   | 5.1  | 5.1  | 4.4  | 3.3  | 4.6 | 4.3 | 7.3  | 7.4  | 7.2  | 7.1  | 5.8  | 5.1  |
| ANGPTL1   | angiopoietin-like 1                                                                       | Gga.12111.1.S1_at       | 7.8  | 8.0  | 6.2  | 5.9  | 5.8 | 5.9 | 9.3  | 9.4  | 9.3  | 9.4  | 7.9  | 7.8  |
| CSRP2     | cysteine and glycine-rich protein 2                                                       | Gga.665.1.S1_at         | 11.3 | 11.3 | 10.0 | 10.2 | 9.2 | 9.2 | 13.4 | 13.4 | 12.5 | 12.5 | 11.3 | 11.4 |
| NELL2     | NEL-like 2 (chicken)                                                                      | Gga.595.1.S1_at         | 10.3 | 10.4 | 8.9  | 8.8  | 8.7 | 8.8 | 12.2 | 12.2 | 11.2 | 11.2 | 10.4 | 10.3 |
| HMGCLL1   | 3-hydroxymethyl-3-methylglutaryl-Coenzyme A lyase-like 1                                  | Gga.10461.1.S1_at       | 7.9  | 7.9  | 6.7  | 6.7  | 6.4 | 5.7 | 9.2  | 9.3  | 9.1  | 8.9  | 8.5  | 8.6  |
| HMGCLL1   | 3-hydroxymethyl-3-methylglutaryl-Coenzyme A lyase-like 1                                  | Gga.10461.2.S1_a_at     | 8.3  | 8.0  | 6.8  | 6.3  | 6.2 | 6.3 | 8.9  | 9.0  | 8.6  | 8.6  | 8.4  | 8.3  |
| ---       | ---                                                                                       | Gga.17934.1.S1_at       | 7.5  | 7.3  | 4.5  | 3.5  | 4.3 | 3.8 | 8.5  | 8.4  | 8.5  | 8.4  | 8.0  | 8.0  |
| ---       | ---                                                                                       | GgaAffx.20313.1.S1_at   | 6.0  | 5.8  | 7.0  | 7.0  | 5.7 | 5.3 | 7.8  | 7.9  | 7.4  | 7.2  | 8.0  | 7.4  |
| ---       | ---                                                                                       | GgaAffx.20976.1.S1_at   | 8.0  | 7.5  | 8.4  | 8.3  | 6.5 | 6.7 | 9.7  | 9.7  | 8.9  | 9.0  | 9.1  | 9.0  |
| ARID1B    | AT rich interactive domain 1B (SWI1-like)                                                 | Gga.10975.1.S1_s_at     | 6.3  | 5.9  | 7.0  | 6.3  | 3.6 | 3.7 | 6.9  | 6.7  | 6.6  | 7.0  | 7.1  | 6.9  |
| ---       | ---                                                                                       | Gga.16209.1.S1_at       | 8.9  | 8.7  | 9.4  | 9.4  | 6.7 | 6.6 | 9.2  | 9.3  | 9.8  | 9.8  | 9.2  | 9.2  |
| WDFY3     | WD repeat and FYVE domain containing 3                                                    | GgaAffx.20566.1.S1_s_at | 5.2  | 5.6  | 4.0  | 4.0  | 3.1 | 3.3 | 6.3  | 6.5  | 5.4  | 5.3  | 6.0  | 6.2  |
| SH3BGR1   | SH3 domain binding glutamic acid-rich protein like                                        | Gga.7956.1.S1_at        | 8.0  | 8.0  | 6.8  | 6.8  | 5.8 | 5.9 | 8.6  | 8.5  | 8.2  | 8.0  | 8.3  | 8.2  |
| CDC73     | cell division cycle 73, Paf1/RNA polymerase II complex component, homolog (S. cerevisiae) | GgaAffx.1653.1.S1_at    | 6.5  | 6.7  | 5.5  | 5.1  | 4.2 | 4.4 | 7.0  | 6.7  | 6.6  | 6.4  | 6.6  | 6.6  |
| ---       | ---                                                                                       | GgaAffx.20241.1.S1_s_at | 7.5  | 7.5  | 6.5  | 6.6  | 5.7 | 5.3 | 7.7  | 7.9  | 7.2  | 7.3  | 7.8  | 7.7  |
| ---       | ---                                                                                       | Gga.13240.1.S1_at       | 8.3  | 8.1  | 6.5  | 6.2  | 3.9 | 3.7 | 8.3  | 8.1  | 7.7  | 7.8  | 8.6  | 8.6  |
| ---       | ---                                                                                       | GgaAffx.25283.1.S1_s_at | 8.4  | 8.3  | 7.3  | 7.0  | 6.2 | 6.1 | 8.4  | 8.5  | 8.2  | 8.0  | 8.6  | 8.3  |
| ---       | ---                                                                                       | GgaAffx.20407.1.S1_at   | 8.4  | 8.4  | 8.3  | 7.9  | 6.7 | 6.6 | 8.6  | 8.3  | 8.8  | 9.0  | 8.7  | 8.7  |
| NF1       | neurofibromin 1                                                                           | GgaAffx.3551.1.S1_at    | 7.1  | 7.0  | 6.6  | 6.8  | 5.5 | 5.5 | 8.2  | 8.6  | 7.3  | 7.6  | 7.9  | 7.7  |
| TH        | tyrosine hydroxylase                                                                      | Gga.327.1.S1_at         | 10.7 | 10.6 | 10.6 | 10.5 | 7.4 | 7.2 | 11.3 | 11.3 | 10.5 | 10.6 | 10.3 | 10.3 |
| CHD7      | chromodomain helicase DNA binding protein 7                                               | Gga.7719.1.S1_s_at      | 9.3  | 9.4  | 9.7  | 9.5  | 7.1 | 6.7 | 9.6  | 9.7  | 9.4  | 9.3  | 9.2  | 9.4  |
| POU2F1    | POU class 2 homeobox 1                                                                    | Gga.836.1.S1_at         | 9.1  | 9.3  | 9.2  | 9.3  | 6.4 | 5.9 | 9.7  | 9.9  | 9.3  | 9.3  | 9.6  | 9.6  |
| ---       | ---                                                                                       | Gga.16090.1.S1_at       | 6.1  | 5.8  | 6.3  | 5.9  | 3.1 | 3.0 | 6.9  | 7.0  | 5.8  | 6.3  | 6.5  | 6.4  |
| CEP170    | centrosomal protein 170kDa                                                                | GgaAffx.12478.1.S1_at   | 8.2  | 8.2  | 8.6  | 8.6  | 5.4 | 4.9 | 9.9  | 9.8  | 8.2  | 8.4  | 8.6  | 8.7  |
| ---       | ---                                                                                       | Gga.18086.1.S1_at       | 7.4  | 7.6  | 7.6  | 7.5  | 6.0 | 5.8 | 8.3  | 8.3  | 8.2  | 8.3  | 8.3  | 8.3  |
| ---       | ---                                                                                       | Gga.15628.1.S1_at       | 10.5 | 10.6 | 10.2 | 10.2 | 8.0 | 8.1 | 11.1 | 11.1 | 11.0 | 11.1 | 10.9 | 10.9 |
| ---       | ---                                                                                       | Gga.17931.1.S1_at       | 9.5  | 9.4  | 9.4  | 9.4  | 7.3 | 7.2 | 10.0 | 10.0 | 10.0 | 10.1 | 10.2 | 10.2 |
| ARID1B    | AT rich interactive domain 1B (SWI1-like)                                                 | GgaAffx.24250.1.S1_s_at | 11.0 | 11.0 | 11.2 | 11.2 | 9.4 | 9.3 | 11.5 | 11.5 | 11.5 | 11.4 | 11.5 | 11.5 |
| PSEN1     | presenilin 1 (Alzheimer disease 3)                                                        | Gga.3864.1.S1_at        | 7.2  | 7.2  | 6.7  | 6.8  | 3.7 | 3.7 | 8.4  | 8.3  | 7.4  | 7.6  | 8.4  | 8.1  |
| TTC3      | tetratricopeptide repeat domain 3                                                         | GgaAffx.10236.4.S1_s_at | 8.7  | 8.4  | 8.3  | 8.5  | 6.9 | 7.0 | 9.2  | 9.1  | 8.9  | 9.0  | 9.0  | 9.2  |
| UBXD7     | UBX domain containing 7                                                                   | Gga.10997.1.S1_s_at     | 9.1  | 9.0  | 8.6  | 8.6  | 6.5 | 6.9 | 9.2  | 9.2  | 9.1  | 9.0  | 9.6  | 9.7  |
| UBXD7     | UBX domain containing 7                                                                   | Gga.12413.1.S1_s_at     | 9.6  | 9.3  | 8.9  | 8.9  | 7.1 | 7.5 | 9.6  | 9.5  | 9.4  | 9.4  | 9.7  | 9.8  |
| ---       | ---                                                                                       | Gga.10820.1.S1_at       | 7.2  | 7.1  | 6.3  | 6.0  | 3.6 | 3.7 | 8.1  | 7.7  | 8.0  | 7.3  | 8.7  | 8.6  |
| USP9X     | Ubiquitin specific peptidase 9, X-linked                                                  | Gga.18949.1.S1_at       | 8.6  | 8.7  | 8.4  | 8.3  | 6.9 | 6.8 | 8.9  | 9.0  | 9.1  | 9.0  | 9.4  | 9.3  |
| ---       | ---                                                                                       | Gga.14858.1.S1_at       | 11.0 | 10.8 | 11.1 | 11.2 | 9.3 | 9.2 | 11.9 | 11.8 | 11.6 | 11.3 | 12.1 | 12.0 |
| PSEN1     | presenilin 1 (Alzheimer disease 3)                                                        | Gga.3864.1.S2_at        | 9.1  | 9.0  | 9.0  | 9.0  | 7.2 | 6.6 | 10.3 | 10.5 | 9.4  | 9.5  | 10.3 | 10.1 |
| LPIN2     | lipin 2                                                                                   | GgaAffx.12825.1.S1_s_at | 8.0  | 8.0  | 7.7  | 7.5  | 5.8 | 5.7 | 9.1  | 9.2  | 8.0  | 7.9  | 7.9  | 7.9  |
| KIF26B    | kinesin family member 26B                                                                 | GgaAffx.23292.1.S1_at   | 8.3  | 8.1  | 7.4  | 7.1  | 5.0 | 4.9 | 8.8  | 8.6  | 8.1  | 8.0  | 7.7  | 7.9  |
| ---       | ---                                                                                       | Gga.19862.1.S1_at       | 5.9  | 6.0  | 6.2  | 6.1  | 3.1 | 3.0 | 7.6  | 7.7  | 7.3  | 6.0  | 6.6  | 6.9  |
| FOXN2     | forkhead box N2                                                                           | GgaAffx.5634.2.S1_s_at  | 6.7  | 6.5  | 6.3  | 6.4  | 4.0 | 3.5 | 7.8  | 7.9  | 7.0  | 7.2  | 7.4  | 6.8  |
| KLF13     | Kruppel-like factor 13                                                                    | Gga.11081.1.S1_s_at     | 6.7  | 6.4  | 5.9  | 6.0  | 4.4 | 4.1 | 8.3  | 8.1  | 7.4  | 7.5  | 6.7  | 6.7  |
| GLI3      | GLI-Kruppel family member GLI3 (Greig cephalopolysyndactyly syndrome)                     | Gga.3297.1.S1_at        | 7.4  | 7.7  | 7.5  | 7.3  | 5.8 | 5.6 | 8.9  | 9.1  | 8.3  | 8.2  | 7.9  | 7.8  |
| ---       | ---                                                                                       | Gga.1444.1.S1_at        | 10.5 | 10.6 | 10.6 | 10.5 | 8.6 | 8.6 | 11.6 | 11.5 | 11.4 | 11.4 | 10.9 | 10.9 |
| ERBB4     | v-erb-a erythroblastic leukemia viral oncogene homolog 4                                  | Gga.393.1.S1_at         | 10.0 | 10.0 | 9.5  | 9.4  | 7.0 | 6.9 | 11.5 | 11.4 | 11.1 | 11.1 | 10.2 | 10.1 |
| ZNF618    | zinc finger protein 618                                                                   | GgaAffx.5580.1.S1_s_at  | 7.0  | 7.0  | 6.8  | 6.8  | 4.8 | 4.8 | 8.5  | 8.6  | 8.0  | 8.1  | 7.5  | 7.4  |
| FIP1L1    | FIP1 like 1 (S. cerevisiae)                                                               | GgaAffx.12153.1.S1_at   | 5.8  | 5.4  | 5.6  | 5.4  | 2.5 | 2.7 | 7.7  | 7.6  | 6.4  | 6.3  | 6.7  | 6.9  |
| ---       | ---                                                                                       | GgaAffx.2267.1.S1_s_at  | 8.5  | 8.5  | 8.8  | 8.8  | 6.7 | 6.8 | 9.9  | 9.8  | 9.3  | 9.3  | 9.3  | 9.5  |
| CASP8AP2  | CASP8 associated protein 2                                                                | Gga.10188.1.S1_s_at     | 8.1  | 8.0  | 8.3  | 8.3  | 6.8 | 6.8 | 9.3  | 9.2  | 8.8  | 8.9  | 8.9  | 8.7  |

|                         |                                                                                                                         |                         |      |      |      |      |     |     |      |      |      |      |      |      |
|-------------------------|-------------------------------------------------------------------------------------------------------------------------|-------------------------|------|------|------|------|-----|-----|------|------|------|------|------|------|
| NFIB                    | nuclear factor I/B                                                                                                      | Gga.17307.1.S1_at       | 10.4 | 10.3 | 10.9 | 10.9 | 8.5 | 8.5 | 12.1 | 12.0 | 11.7 | 11.5 | 11.3 | 11.1 |
| ---                     | ---                                                                                                                     | Gga.18648.1.S1_at       | 4.2  | 4.6  | 5.1  | 5.1  | 2.7 | 2.7 | 6.1  | 6.1  | 6.2  | 6.3  | 5.7  | 5.8  |
| ---                     | ---                                                                                                                     | Gga.19603.1.S1_at       | 7.4  | 7.6  | 7.5  | 7.5  | 5.7 | 5.8 | 9.4  | 9.4  | 9.9  | 9.9  | 9.5  | 9.1  |
| DPF3                    | D4, zinc and double PHD fingers, family 3                                                                               | Gga.46.1.S1_a_at        | 6.1  | 6.4  | 6.1  | 6.1  | 3.9 | 3.9 | 8.1  | 8.1  | 8.1  | 8.3  | 7.5  | 6.9  |
| ---                     | ---                                                                                                                     | Gga.19917.1.S1_at       | 6.3  | 6.2  | 6.1  | 6.3  | 4.8 | 4.4 | 8.1  | 8.1  | 7.7  | 8.0  | 7.4  | 7.1  |
| SLC22A16                | solute carrier family 22 (organic cation transporter), member 16                                                        | Gga.10910.1.S1_s_at     | 7.2  | 6.9  | 6.4  | 6.6  | 5.3 | 5.2 | 7.1  | 7.4  | 7.5  | 8.0  | 7.3  | 7.4  |
| CHRD1                   | chordin-like 1                                                                                                          | Gga.3037.1.S1_s_at      | 5.4  | 5.3  | 4.5  | 4.7  | 3.5 | 3.5 | 6.4  | 6.6  | 7.0  | 6.4  | 5.7  | 5.8  |
| KCNJ5                   | potassium inwardly-rectifying channel, subfamily J, member 5                                                            | GgaAffx.23423.1.S1_at   | 5.1  | 5.1  | 4.3  | 4.4  | 3.5 | 3.1 | 5.4  | 5.6  | 5.7  | 5.9  | 5.7  | 5.4  |
| BMP5                    | bone morphogenetic protein 5                                                                                            | Gga.620.1.S1_at         | 10.2 | 10.2 | 8.4  | 8.0  | 7.3 | 6.7 | 11.3 | 11.3 | 11.3 | 11.4 | 10.8 | 10.9 |
| FBN2                    | fibrillin 2                                                                                                             | GgaAffx.9303.1.S1_s_at  | 7.6  | 7.6  | 6.4  | 6.3  | 5.2 | 5.0 | 8.0  | 8.1  | 8.4  | 8.6  | 7.7  | 7.9  |
| NINJ2                   | ninjurin 2                                                                                                              | Gga.20061.1.S1_at       | 7.8  | 7.6  | 6.3  | 6.7  | 4.0 | 4.4 | 8.4  | 8.3  | 9.0  | 8.7  | 8.1  | 8.1  |
| FGF13                   | fibroblast growth factor 13                                                                                             | GgaAffx.21832.1.S1_s_at | 7.8  | 7.7  | 6.6  | 6.8  | 4.3 | 3.8 | 8.7  | 8.7  | 8.9  | 8.9  | 8.4  | 8.3  |
| FBN2                    | fibrillin 2                                                                                                             | GgaAffx.24486.1.S1_at   | 9.3  | 9.3  | 8.0  | 8.2  | 6.9 | 6.8 | 9.8  | 9.8  | 9.6  | 9.7  | 9.0  | 9.2  |
| FGF13                   | fibroblast growth factor 13                                                                                             | Gga.2685.1.S2_at        | 9.8  | 9.7  | 8.7  | 8.8  | 7.0 | 7.0 | 10.9 | 11.0 | 10.9 | 10.9 | 10.2 | 10.0 |
| BMP2                    | bone morphogenetic protein 2                                                                                            | Gga.3950.1.S1_at        | 8.9  | 8.9  | 7.9  | 7.8  | 6.1 | 6.0 | 9.7  | 9.8  | 10.0 | 9.9  | 8.7  | 8.5  |
| ---                     | ---                                                                                                                     | GgaAffx.20811.1.S1_at   | 7.2  | 7.4  | 6.5  | 6.7  | 6.2 | 6.3 | 7.5  | 7.6  | 8.6  | 8.8  | 8.3  | 8.4  |
| LOC425522 /// LOC776113 | similar to Calcium/calmodulin-dependent protein kinase ID /// similar to Calcium/calmodulin-dependent protein kinase ID | GgaAffx.6185.1.S1_at    | 7.1  | 7.1  | 6.6  | 6.6  | 5.2 | 5.1 | 7.5  | 7.5  | 8.6  | 8.7  | 8.3  | 8.1  |
| LYPLA3                  | lysophospholipase 3 (lysosomal phospholipase A2)                                                                        | GgaAffx.22084.1.S1_at   | 6.7  | 6.5  | 6.5  | 6.5  | 5.1 | 5.5 | 7.0  | 7.3  | 7.0  | 7.4  | 7.7  | 7.6  |
| ---                     | ---                                                                                                                     | Gga.14677.1.S1_at       | 8.2  | 7.7  | 7.9  | 7.7  | 7.0 | 6.5 | 8.3  | 8.2  | 8.5  | 8.3  | 9.0  | 8.7  |
| SLC6A6                  | solute carrier family 6 (neurotransmitter transporter, taurine), member 6                                               | GgaAffx.3989.1.S1_at    | 7.6  | 7.6  | 8.0  | 7.8  | 6.2 | 5.7 | 8.4  | 7.9  | 8.4  | 8.7  | 9.2  | 9.2  |
| GRAMD1B                 | GRAM domain containing 1B                                                                                               | Gga.16193.1.S1_at       | 8.5  | 8.4  | 8.7  | 8.7  | 7.6 | 7.3 | 9.1  | 9.2  | 9.4  | 9.4  | 9.7  | 9.7  |
| ---                     | ---                                                                                                                     | GgaAffx.21484.1.S1_s_at | 7.8  | 7.6  | 8.2  | 8.2  | 7.0 | 6.5 | 8.5  | 8.7  | 8.6  | 8.6  | 9.4  | 9.2  |
| JMJD2A                  | Jumonji domain containing 2A                                                                                            | Gga.5980.1.A1_at        | 5.1  | 4.8  | 4.8  | 5.9  | 3.7 | 3.8 | 5.4  | 5.4  | 5.8  | 6.3  | 6.4  | 6.2  |
| SDC3                    | syndecan 3                                                                                                              | Gga.3136.1.S1_at        | 6.3  | 6.0  | 6.2  | 6.9  | 5.3 | 5.0 | 6.8  | 6.7  | 7.9  | 8.1  | 7.3  | 7.2  |
| LOC427229               | hypothetical LOC427229                                                                                                  | GgaAffx.24584.1.S1_at   | 6.3  | 6.2  | 6.8  | 7.0  | 5.8 | 5.7 | 7.2  | 7.1  | 7.8  | 7.9  | 7.7  | 7.9  |
| ---                     | ---                                                                                                                     | Gga.10213.1.S1_at       | 6.8  | 6.6  | 6.3  | 6.6  | 4.8 | 5.2 | 6.2  | 6.0  | 7.3  | 7.0  | 6.9  | 7.1  |
| ZNF462                  | zinc finger protein 462                                                                                                 | Gga.10310.1.S1_at       | 5.5  | 5.0  | 5.4  | 5.1  | 2.9 | 3.0 | 4.5  | 4.9  | 5.4  | 5.2  | 5.6  | 5.5  |
| GKN2                    | gastrokine 2                                                                                                            | Gga.10723.1.S1_at       | 11.6 | 11.4 | 9.5  | 9.5  | 3.9 | 4.1 | 9.5  | 9.4  | 10.2 | 10.2 | 11.8 | 11.9 |
| ---                     | ---                                                                                                                     | Gga.19343.1.S1_at       | 9.8  | 9.8  | 9.3  | 9.2  | 7.1 | 7.4 | 9.5  | 9.5  | 9.8  | 9.8  | 9.9  | 9.9  |
| ---                     | ---                                                                                                                     | Gga.19987.1.S1_at       | 5.8  | 5.6  | 4.0  | 4.2  | 2.5 | 2.7 | 5.3  | 5.1  | 4.2  | 5.2  | 5.0  | 5.0  |
| MYH4                    | myosin, heavy chain 4, skeletal muscle                                                                                  | GgaAffx.21028.1.S1_s_at | 11.7 | 11.7 | 9.8  | 9.9  | 8.3 | 8.4 | 10.1 | 10.0 | 10.9 | 10.9 | 10.5 | 10.5 |
| LOC768462               | hypothetical protein LOC768462                                                                                          | Gga.18232.1.S1_at       | 5.3  | 5.4  | 4.0  | 3.7  | 5.5 | 5.0 | 7.8  | 7.7  | 5.9  | 6.1  | 6.3  | 6.0  |
| BCMO1                   | beta-carotene 15,15'-monooxygenase 1                                                                                    | Gga.41.1.S1_at          | 6.0  | 5.7  | 2.9  | 3.1  | 5.4 | 5.4 | 7.9  | 7.8  | 5.8  | 5.4  | 5.4  | 5.4  |
| KCNF1                   | potassium voltage-gated channel, subfamily F, member 1                                                                  | GgaAffx.10527.1.S1_at   | 4.9  | 4.9  | 5.7  | 5.6  | 5.6 | 5.6 | 7.1  | 7.2  | 6.8  | 6.6  | 5.7  | 5.2  |
| ---                     | ---                                                                                                                     | Gga.7458.1.S1_at        | 3.2  | 3.3  | 4.6  | 4.1  | 2.9 | 3.6 | 5.4  | 5.7  | 5.4  | 5.7  | 4.6  | 4.6  |
| ---                     | ---                                                                                                                     | GgaAffx.21332.1.S1_s_at | 6.1  | 6.4  | 8.2  | 8.5  | 3.7 | 3.6 | 9.4  | 9.2  | 9.2  | 9.1  | 6.7  | 6.7  |
| LOC424393 /// LOC776927 | similar to HBxAg transactivated protein 2 /// similar to HBxAg transactivated protein 2                                 | GgaAffx.2752.1.S1_s_at  | 5.1  | 5.5  | 6.5  | 6.5  | 4.3 | 4.4 | 8.9  | 8.6  | 7.3  | 7.2  | 6.2  | 6.0  |
| KCNMB1                  | potassium large conductance calcium-activated channel, subfamily M, beta member 1                                       | Gga.918.1.S1_at         | 4.0  | 3.1  | 3.1  | 3.4  | 3.0 | 3.0 | 5.5  | 6.1  | 6.0  | 6.1  | 3.8  | 3.3  |
| SYK                     | spleen tyrosine kinase                                                                                                  | GgaAffx.12646.1.S1_at   | 5.6  | 5.6  | 4.0  | 3.5  | 3.4 | 2.7 | 7.8  | 7.9  | 5.4  | 5.4  | 3.9  | 4.1  |
| ---                     | ---                                                                                                                     | Gga.7352.1.S1_at        | 5.7  | 5.4  | 3.1  | 3.1  | 3.2 | 3.1 | 7.0  | 7.0  | 5.7  | 5.4  | 3.1  | 3.9  |
| SCTR                    | secretin receptor                                                                                                       | GgaAffx.7679.1.S1_s_at  | 7.3  | 7.1  | 3.7  | 3.7  | 3.2 | 3.6 | 8.6  | 8.6  | 6.7  | 6.4  | 3.6  | 3.7  |
| GAD1                    | glutamate decarboxylase 1 (brain, 67kDa)                                                                                | Gga.441.1.S1_at         | 5.9  | 5.7  | 2.9  | 2.9  | 2.4 | 2.2 | 8.2  | 8.3  | 6.3  | 6.1  | 3.2  | 2.9  |
| SALL1                   | sal-like 1 (Drosophila)                                                                                                 | Gga.1817.1.S1_at        | 4.7  | 5.1  | 2.7  | 2.6  | 2.7 | 2.7 | 6.9  | 7.0  | 5.1  | 5.2  | 2.6  | 2.7  |
| EIF2AK4                 | eukaryotic translation initiation factor 2 alpha kinase 4                                                               | Gga.9282.1.S1_s_at      | 6.2  | 6.1  | 4.2  | 4.1  | 4.2 | 4.2 | 7.7  | 7.6  | 6.1  | 6.3  | 4.2  | 3.9  |
| LOC418543               | hypothetical gene supported by BX933825; CR407341                                                                       | GgaAffx.20268.1.S1_s_at | 6.7  | 7.0  | 5.0  | 5.3  | 2.3 | 2.7 | 11.6 | 11.7 | 7.7  | 7.8  | 4.3  | 4.3  |
| LOC777513               | Similar to alpha-2 type IX collagen                                                                                     | Gga.16241.1.S1_at       | 6.6  | 6.6  | 5.5  | 5.3  | 3.7 | 4.1 | 8.2  | 8.4  | 7.6  | 7.8  | 5.0  | 5.4  |
| CKM                     | creatine kinase, muscle                                                                                                 | Gga.4308.1.S1_at        | 8.2  | 8.3  | 6.4  | 6.5  | 3.8 | 3.7 | 10.7 | 10.7 | 8.6  | 8.9  | 5.2  | 5.4  |

|                     |                                                                                      |                         |     |     |     |     |     |     |      |      |      |      |     |     |
|---------------------|--------------------------------------------------------------------------------------|-------------------------|-----|-----|-----|-----|-----|-----|------|------|------|------|-----|-----|
| UNC5C               | unc-5 homolog C (C. elegans)                                                         | Gga.8535.1.S2_at        | 8.2 | 8.1 | 6.7 | 6.3 | 4.4 | 4.4 | 10.0 | 9.8  | 8.6  | 8.6  | 6.5 | 6.5 |
| ---                 | ---                                                                                  | Gga.5505.1.S1_a_at      | 7.3 | 7.1 | 6.2 | 6.8 | 3.6 | 4.0 | 9.4  | 9.3  | 8.4  | 8.2  | 5.1 | 5.4 |
| ---                 | ---                                                                                  | Gga.14974.1.S1_at       | 6.8 | 6.7 | 6.1 | 6.2 | 4.5 | 3.5 | 9.3  | 9.3  | 8.4  | 8.2  | 5.3 | 5.2 |
| GJB6                | gap junction protein, beta 6, 30kDa                                                  | Gga.1951.1.S1_at        | 6.0 | 6.1 | 6.1 | 5.7 | 3.5 | 3.1 | 8.7  | 8.6  | 7.7  | 7.8  | 4.1 | 4.0 |
| C9orf30             | chromosome 9 open reading frame 30                                                   | Gga.12492.1.S1_at       | 5.9 | 6.0 | 5.5 | 5.4 | 4.9 | 5.1 | 8.0  | 8.1  | 6.8  | 6.2  | 4.9 | 5.5 |
| INHBB               | inhibin, beta B                                                                      | Gga.520.1.S1_at         | 5.0 | 4.8 | 4.4 | 5.1 | 3.4 | 3.4 | 7.8  | 7.6  | 6.4  | 6.9  | 4.0 | 3.4 |
| DIO2                | deiodinase, iodothyronine, type II                                                   | Gga.1819.1.S1_at        | 9.5 | 9.5 | 9.1 | 9.0 | 8.2 | 8.0 | 11.9 | 11.9 | 10.9 | 10.8 | 9.4 | 9.5 |
| BDP1                | B double prime 1, subunit of RNA polymerase III transcription initiation factor IIIB | GgaAffx.1633.1.S1_at    | 2.7 | 2.7 | 2.6 | 2.9 | 1.9 | 1.9 | 5.1  | 5.1  | 3.9  | 3.9  | 2.7 | 2.7 |
| COL9A1              | collagen, type IX, alpha 1                                                           | Gga.4990.1.S1_at        | 4.9 | 4.8 | 4.3 | 4.4 | 3.8 | 3.9 | 7.1  | 7.0  | 5.3  | 6.4  | 4.4 | 4.4 |
| ---                 | ---                                                                                  | Gga.18700.1.S1_at       | 5.3 | 5.4 | 4.5 | 4.0 | 3.9 | 3.5 | 8.0  | 7.6  | 6.3  | 6.8  | 3.4 | 4.5 |
| TWIST1              | twist homolog 1 (Drosophila)                                                         | Gga.3973.1.S1_at        | 8.0 | 7.9 | 7.5 | 7.4 | 7.5 | 7.2 | 10.0 | 10.0 | 9.2  | 9.2  | 7.4 | 7.5 |
| KCNG4               | potassium voltage-gated channel, subfamily G, member 4                               | Gga.534.1.S1_at         | 3.8 | 2.7 | 2.1 | 2.1 | 2.0 | 1.9 | 5.7  | 6.1  | 4.5  | 4.8  | 2.3 | 2.5 |
| NR2F2               | nuclear receptor subfamily 2, group F, member 2                                      | Gga.4445.1.S1_at        | 4.8 | 4.9 | 5.6 | 5.7 | 4.7 | 4.7 | 7.8  | 8.0  | 7.1  | 7.3  | 7.2 | 5.9 |
| ---                 | ---                                                                                  | Gga.8439.1.S1_at        | 3.5 | 3.6 | 3.0 | 3.0 | 3.0 | 3.2 | 6.0  | 5.7  | 4.6  | 5.0  | 4.4 | 4.2 |
| DISP1 /// LOC770469 | dispatched homolog 1 (Drosophila) /// hypothetical protein LOC770469                 | Gga.9562.1.S1_at        | 2.6 | 2.3 | 2.2 | 2.1 | 2.1 | 2.1 | 5.1  | 4.6  | 4.5  | 3.8  | 3.4 | 3.2 |
| ADCY8               | adenylate cyclase 8 (brain)                                                          | GgaAffx.10436.4.S1_s_at | 6.0 | 6.1 | 5.8 | 5.8 | 4.6 | 4.4 | 9.2  | 9.0  | 8.2  | 8.5  | 7.5 | 7.3 |
| ---                 | ---                                                                                  | Gga.14273.1.S1_at       | 8.1 | 8.2 | 8.3 | 8.3 | 8.1 | 7.9 | 10.3 | 10.4 | 9.8  | 9.7  | 8.9 | 9.2 |
| ADCY8               | adenylate cyclase 8 (brain)                                                          | GgaAffx.10436.2.S1_at   | 5.6 | 5.6 | 5.8 | 5.6 | 5.0 | 4.7 | 8.3  | 8.2  | 7.5  | 7.6  | 6.1 | 6.4 |
| AXUD1               | AXIN1 up-regulated 1                                                                 | GgaAffx.3750.1.S1_at    | 4.0 | 3.7 | 4.8 | 3.8 | 3.0 | 3.2 | 7.3  | 7.3  | 6.7  | 6.6  | 5.0 | 5.0 |
| ---                 | ---                                                                                  | Gga.16108.1.S1_at       | 5.2 | 5.4 | 4.4 | 4.2 | 4.1 | 4.1 | 7.7  | 7.8  | 5.9  | 5.3  | 5.4 | 5.4 |
| FER1L3              | fer-1-like 3, myoferlin (C. elegans)                                                 | Gga.2171.1.S1_at        | 6.1 | 5.8 | 4.9 | 4.6 | 5.1 | 4.7 | 8.2  | 8.1  | 6.4  | 6.5  | 5.7 | 5.7 |
| EFHA1               | EF-hand domain family, member A1                                                     | Gga.5427.1.S1_at        | 5.6 | 5.2 | 5.0 | 5.0 | 3.9 | 4.4 | 7.8  | 7.7  | 5.7  | 5.4  | 5.8 | 5.6 |
| HN1L                | hematological and neurological expressed 1-like                                      | GgaAffx.5895.1.S1_s_at  | 3.2 | 2.9 | 2.8 | 2.7 | 2.2 | 2.2 | 5.0  | 5.2  | 3.9  | 3.4  | 3.7 | 3.0 |
| TOX3                | TOX high mobility group box family member 3                                          | Gga.11677.1.S1_at       | 3.9 | 3.8 | 3.6 | 4.1 | 3.6 | 4.0 | 6.0  | 5.9  | 4.5  | 4.9  | 4.3 | 4.6 |
| ---                 | ---                                                                                  | Gga.17875.1.S1_at       | 3.0 | 2.8 | 2.9 | 3.0 | 3.5 | 4.0 | 6.1  | 5.8  | 4.6  | 4.6  | 3.8 | 3.2 |
| STEAP4              | STEAP family member 4                                                                | GgaAffx.5682.1.S1_at    | 3.1 | 3.5 | 3.1 | 3.0 | 3.1 | 3.1 | 8.5  | 8.4  | 5.0  | 5.5  | 3.2 | 3.5 |
| STEAP4              | STEAP family member 4                                                                | GgaAffx.5682.2.S1_s_at  | 2.3 | 2.3 | 2.3 | 2.3 | 2.3 | 2.3 | 7.5  | 7.8  | 4.4  | 4.2  | 2.4 | 2.4 |
| ---                 | ---                                                                                  | Gga.14898.1.S1_at       | 5.7 | 6.0 | 5.7 | 5.7 | 6.0 | 5.6 | 8.0  | 8.3  | 6.8  | 7.2  | 6.1 | 6.0 |
| ---                 | ---                                                                                  | GgaAffx.21462.1.S1_at   | 2.8 | 2.8 | 2.9 | 2.9 | 2.8 | 2.9 | 7.8  | 8.0  | 5.4  | 6.1  | 2.9 | 2.8 |
| GRB2                | growth factor receptor-bound protein 2                                               | Gga.2170.1.S1_at        | 6.9 | 6.7 | 7.0 | 7.0 | 4.9 | 4.9 | 8.9  | 9.2  | 6.5  | 6.1  | 6.6 | 6.9 |
| ---                 | ---                                                                                  | Gga.14336.1.S1_at       | 2.4 | 2.7 | 2.5 | 2.4 | 2.1 | 2.0 | 4.6  | 5.1  | 2.6  | 2.4  | 3.9 | 3.4 |
| ADIPOR2             | adiponectin receptor 2                                                               | Gga.8371.1.S1_s_at      | 5.1 | 5.3 | 6.0 | 6.0 | 5.3 | 5.5 | 7.3  | 7.4  | 5.5  | 5.7  | 6.3 | 6.3 |
| ---                 | ---                                                                                  | GgaAffx.21503.1.S1_s_at | 5.8 | 5.5 | 6.2 | 6.0 | 5.0 | 4.7 | 8.2  | 8.6  | 5.7  | 6.4  | 6.5 | 6.9 |
| YKT6                | YKT6 v-SNARE homolog (S. cerevisiae)                                                 | GgaAffx.8342.1.S1_at    | 3.1 | 3.4 | 3.9 | 4.2 | 2.6 | 3.4 | 5.4  | 5.3  | 3.5  | 3.6  | 3.6 | 2.3 |
| CD3E                | CD3e molecule, epsilon (CD3-TCR complex)                                             | Gga.4970.1.S1_at        | 4.1 | 3.5 | 2.4 | 2.4 | 3.4 | 3.5 | 7.1  | 7.2  | 3.9  | 4.0  | 3.7 | 3.5 |
| LRCH2               | leucine-rich repeats and calponin homology (CH) domain containing 2                  | Gga.13393.1.S1_s_at     | 4.7 | 4.5 | 5.0 | 4.7 | 4.0 | 4.0 | 6.9  | 6.6  | 4.5  | 4.6  | 3.6 | 4.0 |
| FAM44A              | family with sequence similarity 44, member A                                         | GgaAffx.24441.1.S1_s_at | 6.1 | 5.9 | 6.3 | 5.8 | 5.5 | 5.4 | 8.4  | 8.7  | 5.4  | 5.7  | 4.8 | 4.8 |
| SYNE2               | spectrin repeat containing, nuclear envelope 2                                       | Gga.17077.1.S1_s_at     | 5.7 | 5.4 | 5.3 | 5.1 | 4.8 | 4.9 | 8.3  | 8.1  | 4.8  | 4.9  | 4.6 | 5.0 |
| ALX1                | ALX homeobox 1                                                                       | GgaAffx.23470.1.S1_at   | 3.0 | 2.8 | 2.4 | 2.3 | 2.1 | 2.1 | 5.9  | 5.6  | 2.7  | 2.6  | 2.6 | 2.4 |
| ---                 | ---                                                                                  | Gga.12890.2.S1_at       | 3.3 | 3.5 | 3.1 | 3.1 | 3.1 | 3.0 | 5.4  | 5.8  | 3.1  | 3.2  | 3.2 | 3.2 |
| SYNE2               | spectrin repeat containing, nuclear envelope 2                                       | Gga.15111.1.S1_s_at     | 3.0 | 3.0 | 3.2 | 3.0 | 2.9 | 2.8 | 5.0  | 5.1  | 3.0  | 2.9  | 2.8 | 3.0 |
| DIO3                | deiodinase, iodothyronine, type III                                                  | Gga.552.1.S1_at         | 2.9 | 3.0 | 2.9 | 2.9 | 2.9 | 2.9 | 6.2  | 6.2  | 2.9  | 2.9  | 2.9 | 3.0 |
| ---                 | ---                                                                                  | GgaAffx.20318.1.S1_at   | 2.1 | 2.3 | 2.0 | 2.0 | 2.0 | 2.0 | 4.7  | 4.4  | 2.0  | 2.0  | 2.0 | 2.0 |
| ---                 | ---                                                                                  | Gga.13286.1.S1_at       | 2.1 | 2.1 | 2.3 | 2.1 | 2.1 | 2.0 | 4.6  | 4.6  | 2.7  | 2.6  | 2.1 | 2.1 |
| ---                 | ---                                                                                  | Gga.7073.1.S1_at        | 3.7 | 3.3 | 3.2 | 3.2 | 3.0 | 3.1 | 5.7  | 6.1  | 3.8  | 4.0  | 3.3 | 3.5 |
| ---                 | ---                                                                                  | Gga.18273.1.S1_at       | 4.7 | 4.9 | 5.7 | 6.1 | 5.3 | 5.4 | 7.6  | 7.3  | 5.3  | 5.2  | 5.3 | 5.2 |
| SREK1               | splicing regulatory glutamine/lysine-rich protein 1                                  | Gga.12620.1.S1_at       | 5.6 | 5.8 | 6.6 | 6.2 | 6.4 | 6.4 | 8.6  | 8.4  | 6.9  | 7.0  | 6.0 | 5.3 |
| GMPPB               | GDP-mannose pyrophosphorylase B                                                      | GgaAffx.1663.1.S1_at    | 5.5 | 5.4 | 6.5 | 6.3 | 5.9 | 5.8 | 7.4  | 7.5  | 6.2  | 6.4  | 5.3 | 5.6 |
| ---                 | ---                                                                                  | GgaAffx.7808.1.S1_at    | 1.0 | 1.1 | 2.4 | 2.2 | 1.1 | 1.1 | 3.7  | 3.8  | 2.1  | 2.3  | 1.1 | 1.0 |
| LOC395914           | lymphotactin                                                                         | Gga.542.1.S1_at         | 6.3 | 6.6 | 5.8 | 5.7 | 6.2 | 6.6 | 7.1  | 7.0  | 3.6  | 3.7  | 7.6 | 7.2 |
| MCM6                | minichromosome maintenance complex component 6                                       | GgaAffx.12275.1.S1_at   | 6.0 | 5.7 | 5.7 | 6.2 | 6.1 | 5.8 | 3.3  | 3.1  | 5.7  | 5.1  | 4.5 | 4.9 |

|           |                                                                                                      |                         |      |      |      |      |      |      |      |      |      |      |      |      |
|-----------|------------------------------------------------------------------------------------------------------|-------------------------|------|------|------|------|------|------|------|------|------|------|------|------|
| LOC769178 | hypothetical protein LOC769178                                                                       | GgaAffx.10789.1.S1_at   | 7.7  | 7.5  | 8.3  | 8.4  | 9.0  | 9.2  | 5.2  | 4.8  | 8.2  | 8.2  | 9.0  | 9.2  |
| PLA2G4F   | phospholipase A2, group IVF                                                                          | GgaAffx.5653.2.S1_at    | 6.5  | 6.9  | 7.6  | 7.9  | 8.8  | 8.7  | 4.9  | 4.5  | 7.5  | 7.1  | 8.0  | 8.0  |
| MDGA2     | MAM domain containing glycosylphosphatidylinositol anchor 2                                          | GgaAffx.7749.1.S1_at    | 6.3  | 5.8  | 8.1  | 7.7  | 6.7  | 7.0  | 5.6  | 5.6  | 5.2  | 5.4  | 3.3  | 4.3  |
| ---       | ---                                                                                                  | GgaAffx.20839.1.S1_s_at | 9.8  | 9.8  | 10.6 | 10.6 | 9.8  | 9.6  | 8.3  | 8.2  | 8.5  | 8.5  | 8.8  | 8.8  |
| GBX2      | gastrulation brain homeobox 2                                                                        | Gga.565.1.S1_at         | 10.7 | 10.7 | 11.6 | 11.7 | 11.2 | 11.3 | 9.9  | 10.0 | 9.5  | 9.7  | 10.4 | 10.3 |
| NME1      | non-metastatic cells 1, protein (NM23A) expressed in                                                 | Gga.9996.1.S1_at        | 5.4  | 5.2  | 5.3  | 5.9  | 6.2  | 5.7  | 4.6  | 4.8  | 4.0  | 4.3  | 3.9  | 3.6  |
| TCTE1     | T-complex-associated-testis-expressed 1                                                              | Gga.17603.1.S1_at       | 10.4 | 10.4 | 10.5 | 10.6 | 10.5 | 10.4 | 9.2  | 9.0  | 7.8  | 7.9  | 8.1  | 8.6  |
| ---       | ---                                                                                                  | Gga.9814.1.S1_at        | 8.7  | 8.9  | 9.3  | 9.5  | 9.3  | 9.2  | 7.2  | 7.1  | 6.4  | 6.7  | 5.7  | 6.3  |
| KCNMB4    | potassium large conductance calcium-activated channel, subfamily M, beta member 4                    | Gga.12259.1.S1_at       | 6.0  | 5.8  | 7.4  | 7.5  | 7.1  | 7.0  | 5.4  | 5.3  | 5.0  | 4.6  | 4.9  | 4.7  |
| C12orf34  | chromosome 12 open reading frame 34                                                                  | GgaAffx.3219.1.S1_at    | 4.6  | 4.8  | 6.2  | 5.9  | 7.0  | 6.9  | 3.4  | 3.2  | 2.7  | 2.5  | 2.3  | 2.8  |
| TMEM132B  | transmembrane protein 132B                                                                           | GgaAffx.1786.2.S1_s_at  | 4.2  | 4.0  | 5.0  | 4.9  | 5.2  | 5.3  | 2.6  | 2.6  | 2.6  | 2.6  | 2.7  | 2.6  |
| TMEM132B  | transmembrane protein 132B                                                                           | GgaAffx.1786.1.S1_at    | 5.0  | 4.4  | 5.7  | 5.8  | 5.7  | 5.9  | 3.1  | 3.0  | 3.0  | 2.4  | 3.3  | 3.1  |
| S100A9    | S100 calcium binding protein A9                                                                      | Gga.740.1.S1_at         | 3.6  | 3.8  | 6.5  | 6.6  | 6.4  | 6.2  | 3.5  | 3.6  | 4.1  | 3.8  | 5.5  | 5.5  |
| ---       | ---                                                                                                  | Gga.11306.1.S1_at       | 3.5  | 3.3  | 6.3  | 6.2  | 6.7  | 6.6  | 3.2  | 3.6  | 3.8  | 3.9  | 6.1  | 5.6  |
| KCNJ3     | potassium inwardly-rectifying channel, subfamily J, member 3                                         | Gga.4680.1.S2_at        | 3.3  | 3.1  | 5.9  | 5.4  | 6.3  | 6.3  | 2.9  | 2.9  | 3.2  | 3.7  | 5.4  | 4.7  |
| ---       | ---                                                                                                  | Gga.14127.1.S1_at       | 6.4  | 6.2  | 8.1  | 8.2  | 8.6  | 8.8  | 5.3  | 5.1  | 5.6  | 5.4  | 6.1  | 6.1  |
| ---       | ---                                                                                                  | GgaAffx.20583.1.S1_at   | 4.6  | 4.7  | 6.6  | 6.1  | 7.3  | 6.7  | 4.0  | 3.6  | 3.9  | 4.2  | 4.3  | 4.3  |
| LOC428660 | similar to very large inducible GTPase-1                                                             | Gga.7800.1.S1_at        | 6.1  | 6.1  | 6.5  | 7.0  | 8.6  | 8.5  | 5.4  | 4.9  | 6.6  | 6.0  | 5.7  | 6.1  |
| SRD5A2    | steroid-5-alpha-reductase, alpha polypeptide 2 (3-oxo-5 alpha-steroid delta 4-dehydrogenase alpha 2) | GgaAffx.6721.1.S1_at    | 2.6  | 2.7  | 3.7  | 2.9  | 5.3  | 5.7  | 2.5  | 2.5  | 2.5  | 2.6  | 2.9  | 2.7  |
| FAM20C    | family with sequence similarity 20, member C                                                         | Gga.12092.1.S1_at       | 5.6  | 5.2  | 6.3  | 6.2  | 7.4  | 7.9  | 4.6  | 4.7  | 5.2  | 5.3  | 5.7  | 5.4  |
| ADRA2C    | adrenergic, alpha-2C-, receptor                                                                      | GgaAffx.9949.1.S1_at    | 5.1  | 5.6  | 7.0  | 6.4  | 7.9  | 7.8  | 5.1  | 5.3  | 5.6  | 5.9  | 5.6  | 5.6  |
| ---       | ---                                                                                                  | Gga.16500.1.S1_at       | 3.7  | 3.8  | 5.4  | 5.5  | 7.2  | 7.4  | 3.7  | 3.7  | 3.8  | 3.8  | 3.8  | 3.8  |
| ---       | ---                                                                                                  | Gga.7846.1.A1_at        | 2.1  | 2.0  | 3.6  | 3.4  | 5.6  | 5.5  | 1.9  | 1.9  | 2.3  | 2.4  | 2.3  | 2.7  |
| ---       | ---                                                                                                  | Gga.13446.1.S1_at       | 6.6  | 6.5  | 6.6  | 6.3  | 8.4  | 8.3  | 6.1  | 6.2  | 5.6  | 6.1  | 6.2  | 5.9  |
| ---       | ---                                                                                                  | GgaAffx.20614.1.S1_at   | 2.4  | 2.5  | 2.5  | 2.5  | 5.7  | 5.2  | 2.4  | 2.4  | 2.7  | 2.8  | 3.0  | 3.6  |
| CPXM2     | carboxypeptidase X (M14 family), member 2                                                            | GgaAffx.6084.3.S1_s_at  | 1.6  | 1.6  | 1.8  | 1.7  | 5.2  | 5.1  | 1.5  | 1.4  | 1.6  | 1.6  | 1.6  | 2.1  |
| FBXO22    | F-box protein 22                                                                                     | GgaAffx.11898.1.S1_at   | 5.3  | 4.4  | 5.6  | 4.6  | 5.9  | 5.9  | 5.8  | 5.9  | 5.6  | 5.5  | 2.5  | 2.5  |
| NACA      | nascent polypeptide-associated complex alpha subunit                                                 | Gga.4715.2.S1_a_at      | 9.4  | 9.5  | 10.2 | 10.2 | 10.6 | 10.6 | 11.1 | 11.1 | 9.6  | 9.6  | 8.1  | 8.2  |
| C18orf45  | chromosome 18 open reading frame 45                                                                  | Gga.8423.3.S1_a_at      | 7.6  | 7.4  | 7.2  | 7.3  | 7.7  | 7.7  | 8.0  | 8.1  | 6.9  | 7.0  | 5.5  | 5.3  |
| ADRBK2    | adrenergic, beta, receptor kinase 2                                                                  | Gga.6318.1.S1_at        | 4.5  | 4.1  | 5.3  | 5.1  | 6.1  | 6.1  | 4.0  | 4.9  | 3.9  | 4.0  | 2.6  | 2.7  |
| DPP9      | dipeptidyl-peptidase 9                                                                               | GgaAffx.26135.1.S1_at   | 5.2  | 5.2  | 5.9  | 5.6  | 6.7  | 6.6  | 5.8  | 5.8  | 5.8  | 5.7  | 4.3  | 4.4  |
| COL2A1    | collagen, type II, alpha 1                                                                           | GgaAffx.20952.1.A1_s_at | 8.7  | 8.7  | 8.7  | 8.6  | 7.9  | 7.9  | 9.0  | 8.9  | 8.0  | 8.0  | 5.7  | 6.0  |
| LEF1      | lymphoid enhancer-binding factor 1                                                                   | Gga.2694.1.S2_s_at      | 7.5  | 7.6  | 7.6  | 7.8  | 7.4  | 7.6  | 7.7  | 7.7  | 7.4  | 7.2  | 5.7  | 5.3  |
| TBX5      | T-box 5                                                                                              | Gga.961.2.S1_a_at       | 7.4  | 7.7  | 8.0  | 8.1  | 6.6  | 6.7  | 6.9  | 6.9  | 5.8  | 5.4  | 2.6  | 2.3  |
| ---       | ---                                                                                                  | Gga.19234.1.S1_at       | 7.6  | 7.5  | 8.0  | 7.8  | 7.4  | 7.5  | 7.2  | 7.1  | 6.8  | 7.0  | 5.5  | 5.2  |
| TBX5      | T-box 5                                                                                              | Gga.961.1.S1_at         | 7.1  | 7.1  | 8.0  | 8.0  | 6.7  | 6.8  | 7.2  | 7.1  | 5.6  | 5.8  | 4.6  | 4.5  |
| GJD2      | gap junction protein, delta 2, 36kDa                                                                 | Gga.96.1.S1_a_at        | 8.3  | 8.4  | 7.6  | 7.6  | 6.9  | 6.9  | 7.7  | 7.5  | 5.5  | 6.3  | 4.8  | 4.5  |
| DOK5      | docking protein 5                                                                                    | GgaAffx.22360.1.S1_at   | 9.2  | 9.3  | 8.8  | 8.7  | 8.3  | 8.3  | 7.6  | 7.9  | 6.0  | 6.2  | 3.4  | 4.4  |
| FAM5B     | family with sequence similarity 5, member B                                                          | GgaAffx.2754.1.S1_at    | 9.9  | 10.0 | 9.8  | 9.9  | 8.9  | 8.8  | 8.1  | 8.2  | 6.6  | 5.8  | 3.8  | 4.3  |
| ---       | ---                                                                                                  | Gga.16205.1.S1_at       | 7.7  | 8.0  | 7.6  | 7.6  | 7.6  | 7.2  | 7.7  | 7.4  | 8.4  | 8.3  | 5.2  | 4.7  |
| PRIM2     | primase, DNA, polypeptide 2 (58kDa)                                                                  | GgaAffx.11681.1.S1_at   | 7.4  | 7.3  | 7.6  | 7.2  | 7.8  | 7.3  | 6.8  | 6.9  | 7.5  | 7.2  | 5.0  | 4.9  |
| C4orf31   | chromosome 4 open reading frame 31                                                                   | GgaAffx.20406.1.S1_at   | 5.7  | 5.9  | 4.5  | 4.5  | 4.4  | 4.5  | 3.2  | 3.7  | 4.3  | 5.1  | 4.3  | 4.4  |
| TTR       | transthyretin                                                                                        | Gga.2620.1.S1_at        | 7.3  | 6.8  | 3.3  | 3.4  | 6.0  | 6.2  | 2.2  | 3.3  | 4.9  | 5.3  | 3.3  | 3.7  |
| TMEM63C   | transmembrane protein 63C                                                                            | GgaAffx.6577.1.S1_s_at  | 8.8  | 7.8  | 8.8  | 8.9  | 6.7  | 7.0  | 6.8  | 6.8  | 6.7  | 6.8  | 6.7  | 6.7  |
| SLC46A2   | solute carrier family 46, member 2                                                                   | GgaAffx.11175.1.S1_at   | 8.5  | 8.2  | 6.6  | 7.0  | 4.9  | 3.9  | 5.3  | 5.2  | 3.7  | 2.7  | 4.3  | 4.3  |
| ---       | ---                                                                                                  | Gga.14707.1.A1_at       | 6.9  | 6.7  | 6.0  | 6.5  | 6.4  | 6.6  | 3.3  | 3.4  | 4.1  | 4.1  | 3.2  | 2.7  |
| ---       | ---                                                                                                  | Gga.5977.1.S1_at        | 12.3 | 12.4 | 12.3 | 12.2 | 12.1 | 12.1 | 10.3 | 10.2 | 10.4 | 10.3 | 10.4 | 10.3 |
| ---       | ---                                                                                                  | Gga.14707.1.S1_at       | 11.1 | 11.0 | 10.5 | 10.4 | 10.2 | 10.2 | 9.0  | 9.0  | 8.8  | 8.8  | 7.5  | 7.4  |
| CADM2     | cell adhesion molecule 2                                                                             | Gga.10186.1.S1_at       | 11.6 | 11.7 | 11.3 | 11.2 | 11.0 | 10.9 | 9.8  | 9.9  | 9.6  | 9.6  | 8.9  | 8.8  |
| HTR2A     | 5-hydroxytryptamine (serotonin) receptor 2A                                                          | GgaAffx.10880.1.S1_at   | 6.2  | 6.2  | 5.1  | 4.8  | 4.6  | 4.5  | 3.3  | 3.6  | 2.5  | 2.3  | 2.3  | 2.6  |

|           |                                                             |                         |      |      |     |     |     |     |     |     |     |     |     |     |
|-----------|-------------------------------------------------------------|-------------------------|------|------|-----|-----|-----|-----|-----|-----|-----|-----|-----|-----|
| ADAMTS20  | ADAM metalloproteinase with thrombospondin type 1 motif, 20 | GgaAffx.22967.2.S1_s_at | 8.0  | 8.2  | 6.7 | 6.7 | 6.2 | 6.1 | 4.8 | 5.2 | 5.0 | 5.3 | 4.0 | 4.8 |
| C4orf31   | Chromosome 4 open reading frame 31                          | Gga.12209.2.S1_a_at     | 9.3  | 9.2  | 8.1 | 8.2 | 8.0 | 8.1 | 6.8 | 6.7 | 7.9 | 7.8 | 7.0 | 6.5 |
| CXCL14    | chemokine (C-X-C motif) ligand 14                           | GgaAffx.21581.1.S1_s_at | 8.8  | 8.7  | 7.8 | 7.7 | 6.6 | 6.3 | 4.9 | 4.9 | 6.4 | 6.1 | 6.9 | 5.6 |
| ADAMTS20  | ADAM metalloproteinase with thrombospondin type 1 motif, 20 | GgaAffx.6011.2.S1_s_at  | 8.6  | 8.6  | 7.6 | 7.6 | 6.7 | 6.5 | 6.7 | 6.5 | 6.8 | 6.8 | 6.8 | 6.7 |
| ADAMTS20  | ADAM metalloproteinase with thrombospondin type 1 motif, 20 | GgaAffx.22967.1.S1_at   | 10.2 | 10.3 | 9.2 | 9.2 | 8.2 | 8.4 | 7.4 | 7.4 | 8.2 | 8.2 | 7.6 | 7.7 |
| ADAMTS20  | ADAM metalloproteinase with thrombospondin type 1 motif, 20 | GgaAffx.6011.1.S1_s_at  | 8.1  | 8.0  | 6.6 | 6.8 | 5.9 | 6.0 | 5.5 | 5.3 | 5.2 | 5.4 | 5.5 | 5.2 |
| AGTR1     | angiotensin II receptor, type 1                             | Gga.632.1.S1_at         | 7.4  | 7.6  | 6.3 | 7.0 | 3.3 | 3.6 | 4.3 | 4.4 | 5.8 | 5.8 | 4.4 | 3.6 |
| AQP3      | aquaporin 3 (Gill blood group)                              | GgaAffx.1642.1.S1_at    | 10.5 | 10.5 | 6.3 | 5.8 | 2.6 | 2.8 | 8.0 | 7.9 | 6.7 | 6.6 | 3.9 | 2.9 |
| ATP11A    | ATPase, class VI, type 11A                                  | Gga.17812.1.S1_s_at     | 7.5  | 7.5  | 6.1 | 6.1 | 5.2 | 5.9 | 5.4 | 5.5 | 5.6 | 5.8 | 5.9 | 5.9 |
| ---       | ---                                                         | Gga.10270.1.S1_at       | 6.8  | 6.7  | 5.1 | 4.8 | 4.1 | 4.1 | 4.8 | 4.5 | 4.3 | 4.6 | 3.9 | 3.9 |
| PVALB     | parvalbumin                                                 | Gga.878.1.S1_at         | 7.5  | 7.6  | 3.4 | 3.3 | 2.5 | 3.2 | 4.3 | 4.0 | 4.2 | 3.7 | 3.5 | 3.0 |
| ---       | ---                                                         | Gga.13563.1.S1_at       | 5.0  | 5.4  | 3.0 | 3.0 | 2.9 | 2.9 | 2.8 | 2.8 | 3.2 | 3.1 | 3.0 | 3.2 |
| LOC424460 | hypothetical LOC424460                                      | GgaAffx.26441.1.S1_at   | 5.1  | 5.4  | 2.8 | 2.8 | 2.8 | 2.8 | 2.7 | 2.7 | 2.7 | 2.8 | 2.8 | 2.8 |
| UPK1B     | uroplakin 1B                                                | Gga.17532.1.S1_s_at     | 5.7  | 5.7  | 2.2 | 2.2 | 2.2 | 2.1 | 2.2 | 2.2 | 2.1 | 2.1 | 2.2 | 2.2 |
| ---       | ---                                                         | Gga.19194.1.S1_at       | 6.5  | 6.5  | 2.4 | 2.4 | 2.4 | 2.4 | 2.5 | 2.5 | 2.3 | 2.4 | 2.4 | 2.4 |
