# Supplementary material
Source: PubMed Central journal article supplement (PMC4112186)
Supplement: NIHMS590998-supplement-Supplemental_table_2.pdf [file NIHMS590998-supplement-Supplemental_table_2.pdf]

Supplemental Table 2. Expression data for probe sets identified as differentially expressed in left ventricle of ligated hearts versus normal left ventricle.

| Gene Annotation |                                                                                          | Expression Data (log2) for all left ventricle samples |        |        |        |        |            |            |         |         |             | Comparison Data |                  |           |                   |                 |         |
|-----------------|------------------------------------------------------------------------------------------|-------------------------------------------------------|--------|--------|--------|--------|------------|------------|---------|---------|-------------|-----------------|------------------|-----------|-------------------|-----------------|---------|
| Symbol          | Title                                                                                    | probe set                                             | E6_LVa | E6_LVb | E8_LVa | E8_LVb | E8_LV_LaLa | E8_LV_LALb | E10_LVa | E10_LVb | Mean (log2) |                 | Present call (%) |           | Mean Difference   | Fold Difference | P value |
|                 |                                                                                          |                                                       |        |        |        |        |            |            |         |         | E8-LV       | E8-LV-LAL       | E8-LV            | E8-LV-LAL | (LV-LAL minus LV) |                 |         |
| ---             | ---                                                                                      | AY013303.CDS1.S1_s_at                                 | 10.01  | 9.93   | 11.75  | 11.8   | 8.87       | 8.83       | 11.22   | 11.22   | 11.77       | 8.85            | 100              | 100       | -2.92             | -7.6            | 0.000   |
| SERPIN2         | serpin peptidase inhibitor, clade B (ovalbumin), member 2                                | Gga.10034.2.S1_a_at                                   | 2.73   | 2.79   | 2.7    | 2.72   | 5          | 4.76       | 2.72    | 2.68    | 2.71        | 4.88            | 50               | 100       | 2.17              | 4.5             | 0.034   |
| FBLN5           | fibulin 5                                                                                | Gga.10096.1.S1_at                                     | 5.86   | 5.42   | 6.3    | 6.14   | 8.7        | 8.62       | 5.76    | 5.23    | 6.22        | 8.66            | 100              | 100       | 2.44              | 5.4             | 0.005   |
| SERPINA10       | serpin peptidase inhibitor, clade A (alpha-1 antitrypsin, antitrypsin), member 10        | Gga.10644.1.S1_at                                     | 2.64   | 2.65   | 2.6    | 2.55   | 5.44       | 5.05       | 2.58    | 2.55    | 2.58        | 5.25            | 0                | 100       | 2.67              | 6.4             | 0.043   |
| ---             | ---                                                                                      | Gga.10720.1.S1_at                                     | 4.86   | 4.65   | 5.75   | 5.88   | 8.47       | 8.26       | 7.86    | 8.09    | 5.82        | 8.36            | 100              | 100       | 2.55              | 5.9             | 0.005   |
| FZD7            | frizzled homolog 7 (Drosophila)                                                          | Gga.110.1.S2_at                                       | 3.11   | 2.99   | 2.69   | 2.91   | 5.08       | 5.28       | 2.66    | 2.64    | 2.8         | 5.18            | 100              | 100       | 2.38              | 5.2             | 0.004   |
| ---             | ---                                                                                      | Gga.11602.1.S1_at                                     | 6.04   | 5.33   | 5.05   | 5.18   | 8.52       | 8.82       | 5.23    | 5.74    | 5.12        | 8.67            | 0                | 100       | 3.55              | 11.7            | 0.010   |
| FGG             | fibrinogen gamma chain                                                                   | Gga.1165.1.S1_at                                      | 3.41   | 3.06   | 2.65   | 2.73   | 7.94       | 7.86       | 3.13    | 3       | 2.69        | 7.9             | 0                | 100       | 5.21              | 37.0            | 0.000   |
| SERPIND1        | serpin peptidase inhibitor, clade D (heparin cofactor), member 1                         | Gga.1166.1.S1_at                                      | 2.07   | 2.07   | 2.19   | 2.05   | 5.19       | 5.26       | 2.35    | 2.39    | 2.12        | 5.23            | 50               | 100       | 3.1               | 8.6             | 0.002   |
| SPP2            | secreted phosphoprotein 2, 24kDa                                                         | Gga.1170.1.S1_a_at                                    | 2.83   | 2.72   | 2.4    | 2.41   | 7          | 7.15       | 3.67    | 3.4     | 2.41        | 7.07            | 0                | 100       | 4.67              | 25.5            | 0.009   |
| ---             | ---                                                                                      | Gga.11937.1.S1_at                                     | 9.06   | 8.93   | 10.4   | 10.44  | 8.11       | 8.43       | 10.91   | 10.84   | 10.42       | 8.27            | 100              | 100       | -2.15             | -4.4            | 0.044   |
| ANGPTL1         | angiotensin-like 1                                                                       | Gga.12111.1.S1_at                                     | 7.84   | 7.95   | 6.18   | 5.91   | 8.9        | 8.93       | 5.78    | 5.89    | 6.05        | 8.91            | 100              | 100       | 2.87              | 7.3             | 0.028   |
| ---             | ---                                                                                      | Gga.12554.2.S1_a_at                                   | 7.33   | 7.43   | 8.46   | 8.5    | 5.7        | 5.47       | 9.37    | 9.29    | 8.48        | 5.59            | 100              | 0         | -2.9              | -7.5            | 0.022   |
| ---             | ---                                                                                      | Gga.12631.1.S1_at                                     | 5.92   | 5.31   | 6.98   | 7      | 4.6        | 4.81       | 6.59    | 6.79    | 6.99        | 4.71            | 100              | 100       | -2.28             | -4.9            | 0.027   |
| ---             | ---                                                                                      | Gga.12912.1.S1_at                                     | 8.47   | 8.69   | 9.9    | 9.79   | 7.54       | 7.44       | 9.42    | 9.27    | 9.85        | 7.49            | 100              | 100       | -2.36             | -5.1            | 0.001   |
| ---             | ---                                                                                      | Gga.13827.1.S1_at                                     | 7.81   | 7.57   | 4.5    | 4.6    | 6.59       | 6.83       | 3.21    | 4.47    | 4.55        | 6.71            | 100              | 100       | 2.17              | 4.5             | 0.016   |
| ---             | ---                                                                                      | Gga.14974.1.S1_at                                     | 6.8    | 6.72   | 6.08   | 6.19   | 8.17       | 8.2        | 4.45    | 3.51    | 6.13        | 8.18            | 100              | 100       | 2.05              | 4.1             | 0.008   |
| PRRX1           | paired related homeobox 1                                                                | Gga.1546.1.S1_at                                      | 6.33   | 6.72   | 4.3    | 4.17   | 7.63       | 7.94       | 3.62    | 3.59    | 4.23        | 7.78            | 100              | 100       | 3.55              | 11.7            | 0.011   |
| PRRX1           | Paired related homeobox 1                                                                | Gga.1546.1.S2_a_at                                    | 7.83   | 7.53   | 5.23   | 5.84   | 8.77       | 8.27       | 4.92    | 5.29    | 5.54        | 8.52            | 100              | 100       | 2.98              | 7.9             | 0.019   |
| ---             | ---                                                                                      | Gga.15847.1.S1_at                                     | 7.4    | 7.77   | 8.48   | 8.67   | 6.5        | 6.02       | 9.13    | 9.14    | 8.58        | 6.26            | 100              | 100       | -2.32             | -5.0            | 0.039   |
| ---             | ---                                                                                      | Gga.16108.1.S1_at                                     | 5.18   | 5.35   | 4.41   | 4.18   | 6.47       | 6.28       | 4.12    | 4.06    | 4.3         | 6.38            | 100              | 100       | 2.08              | 4.2             | 0.006   |
| KRT14           | keratin 14                                                                               | Gga.16196.1.S1_at                                     | 7.16   | 7.18   | 5.04   | 5.29   | 7.21       | 7.44       | 4.73    | 4.85    | 5.16        | 7.33            | 100              | 100       | 2.16              | 4.5             | 0.007   |
| GAL10           | Gal 10                                                                                   | Gga.16863.1.S1_s_at                                   | 1.68   | 1.71   | 1.67   | 1.66   | 7.37       | 7.67       | 1.69    | 1.66    | 1.67        | 7.52            | 0                | 100       | 5.85              | 57.7            | 0.016   |
| TTN             | Titin                                                                                    | Gga.17020.1.S1_at                                     | 5.01   | 4.92   | 5.06   | 5.28   | 7.88       | 7.98       | 3.67    | 3.63    | 5.17        | 7.93            | 100              | 100       | 2.76              | 6.8             | 0.009   |
| SYNE2           | spectrin repeat containing, nuclear envelope 2                                           | Gga.17077.1.S1_s_at                                   | 5.72   | 5.4    | 5.31   | 5.08   | 8.28       | 8.29       | 4.83    | 4.91    | 5.2         | 8.28            | 0                | 100       | 3.09              | 8.5             | 0.024   |
| PRNPIP          | prion protein interacting protein                                                        | Gga.18185.1.S1_at                                     | 5.08   | 5.13   | 7.36   | 7.17   | 4.64       | 4.67       | 7       | 6.96    | 7.26        | 4.65            | 100              | 0         | -2.61             | -6.1            | 0.019   |
| ---             | ---                                                                                      | Gga.18781.1.S1_at                                     | 2.94   | 2.6    | 2.53   | 2.49   | 5.11       | 5.55       | 2.49    | 2.48    | 2.51        | 5.33            | 0                | 100       | 2.82              | 7.1             | 0.049   |
| BCKDHA          | branched chain keto acid dehydrogenase E1, alpha polypeptide                             | Gga.188.1.S1_at                                       | 7.57   | 7.46   | 9.49   | 9.46   | 6.33       | 6.71       | 10.32   | 10.36   | 9.48        | 6.52            | 100              | 0         | -2.95             | -7.7            | 0.040   |
| RSPO3           | R-spondin 3 homolog (Xenopus laevis)                                                     | Gga.19305.1.S1_at                                     | 10.93  | 10.81  | 8.37   | 8.2    | 10.38      | 10.59      | 6.29    | 6.15    | 8.28        | 10.48           | 100              | 100       | 2.2               | 4.6             | 0.004   |
| ---             | ---                                                                                      | Gga.19442.1.S1_at                                     | 7.73   | 6.66   | 8.85   | 8.77   | 6.48       | 6.51       | 9.23    | 9.28    | 8.81        | 6.49            | 100              | 100       | -2.31             | -5.0            | 0.002   |
| LOC770705       | Similar to pol                                                                           | Gga.19447.1.S1_at                                     | 10.96  | 11.02  | 12.29  | 12.33  | 10.21      | 10.08      | 11.77   | 11.81   | 12.31       | 10.15           | 100              | 100       | -2.17             | -4.5            | 0.011   |
| LOC770705       | Similar to pol                                                                           | Gga.19447.2.S1_s_at                                   | 8.74   | 8.71   | 10.54  | 10.47  | 7.65       | 7.58       | 9.9     | 10.02   | 10.51       | 7.61            | 100              | 100       | -2.89             | -7.4            | 0.000   |
| TTN             | titin                                                                                    | Gga.19481.6.S1_at                                     | 7.63   | 7.37   | 7.89   | 7.72   | 9.81       | 9.93       | 5.34    | 5.05    | 7.8         | 9.87            | 100              | 100       | 2.06              | 4.2             | 0.003   |
| ---             | ---                                                                                      | Gga.19752.1.S1_at                                     | 4.07   | 5.17   | 3.75   | 3.51   | 6.01       | 6.1        | 4.81    | 5.19    | 3.63        | 6.05            | 0                | 100       | 2.42              | 5.4             | 0.016   |
| ---             | ---                                                                                      | Gga.19967.1.S1_at                                     | 8.43   | 8.26   | 9.21   | 9.14   | 6.2        | 5.76       | 9.82    | 9.86    | 9.17        | 5.98            | 100              | 100       | -3.19             | -9.1            | 0.039   |
| ---             | ---                                                                                      | Gga.2341.2.S1_at                                      | 4.8    | 4.82   | 6.77   | 7.08   | 4.03       | 3.59       | 6.55    | 6.91    | 6.92        | 3.81            | 100              | 100       | -3.11             | -8.6            | 0.010   |
| MAP2K2          | mitogen-activated protein kinase kinase 2                                                | Gga.2391.1.S1_at                                      | 8.15   | 8.02   | 9      | 9.17   | 6.82       | 6.79       | 9.92    | 9.86    | 9.09        | 6.8             | 100              | 100       | -2.28             | -4.9            | 0.021   |
| TF              | transferrin                                                                              | Gga.2551.2.S1_a_at                                    | 8.77   | 8.56   | 8.39   | 8.29   | 11.1       | 11.21      | 8.91    | 8.92    | 8.34        | 11.16           | 100              | 100       | 2.82              | 7.1             | 0.001   |
| NOV             | nephroblastoma overexpressed gene                                                        | Gga.2587.1.S1_at                                      | 5.37   | 5.56   | 3.67   | 3.62   | 7.67       | 7.73       | 4.51    | 4.83    | 3.65        | 7.7             | 100              | 100       | 4.06              | 16.7            | 0.000   |
| TTR             | transthyretin                                                                            | Gga.2620.1.S1_at                                      | 7.25   | 6.83   | 3.27   | 3.37   | 9.33       | 9.27       | 6.03    | 6.21    | 3.32        | 9.3             | 50               | 100       | 5.98              | 63.1            | 0.000   |
| ACVR1           | activin A receptor, type I                                                               | Gga.2875.2.S1_a_at                                    | 8.6    | 8.38   | 8.82   | 8.86   | 6.8        | 6.84       | 9.5     | 9.57    | 8.84        | 6.82            | 100              | 100       | -2.02             | -4.1            | 0.000   |
| COL8A1          | collagen, type VIII, alpha 1                                                             | Gga.3013.1.S1_at                                      | 2.06   | 2.06   | 3.7    | 3.13   | 5.61       | 5.29       | 7.22    | 7.69    | 3.42        | 5.45            | 100              | 100       | 2.03              | 4.1             | 0.044   |
| HPGDS           | hematopoietic prostaglandin D synthase                                                   | Gga.3137.1.S1_at                                      | 7.12   | 7.56   | 6.25   | 6.19   | 8.25       | 8.31       | 6.64    | 6.76    | 6.22        | 8.28            | 100              | 100       | 2.06              | 4.2             | 0.000   |
| CA2             | carbonic anhydrase II                                                                    | Gga.3986.2.S1_a_at                                    | 10.02  | 10     | 9.99   | 10.03  | 12.46      | 12.46      | 9.75    | 9.78    | 10.01       | 12.46           | 100              | 100       | 2.45              | 5.5             | 0.005   |
| FETUB           | fetuin B                                                                                 | Gga.4055.1.S1_at                                      | 2.41   | 2.43   | 2.41   | 2.4    | 8.29       | 8.07       | 2.44    | 2.4     | 2.41        | 8.18            | 0                | 100       | 5.78              | 54.9            | 0.011   |
| BCMO1           | beta-carotene 15,15'-monooxygenase 1                                                     | Gga.41.1.S1_at                                        | 5.97   | 5.67   | 2.92   | 3.12   | 5.68       | 5.9        | 5.36    | 5.4     | 3.02        | 5.79            | 0                | 100       | 2.77              | 6.8             | 0.003   |
| DCTN2           | dynactin 2 (p50)                                                                         | Gga.4314.1.S1_at                                      | 9.62   | 9.72   | 10.69  | 10.8   | 8.61       | 8.61       | 11.07   | 11.1    | 10.74       | 8.61            | 100              | 100       | -2.13             | -4.4            | 0.017   |
| ALB             | albumin                                                                                  | Gga.4510.1.S1_a_at                                    | 3.53   | 3.88   | 3.99   | 4.22   | 11.41      | 11.48      | 7.68    | 7.54    | 4.1         | 11.45           | 100              | 100       | 7.34              | 162.0           | 0.005   |
| FGB             | fibrinogen beta chain                                                                    | Gga.4557.1.S1_at                                      | 3.93   | 4.13   | 3.41   | 3.48   | 7.57       | 7.9        | 4.02    | 3.98    | 3.45        | 7.74            | 50               | 100       | 4.29              | 19.6            | 0.019   |
| GAL9            | Gal 9                                                                                    | Gga.4562.1.S1_s_at                                    | 2.35   | 2.36   | 2.36   | 2.34   | 5.61       | 5.97       | 2.36    | 2.35    | 2.35        | 5.79            | 100              | 100       | 3.44              | 10.9            | 0.033   |
| FMO6P           | flavin containing monooxygenase 6 pseudogene                                             | Gga.4564.1.S1_a_at                                    | 3.48   | 3.05   | 3.96   | 3.74   | 6.29       | 6.18       | 4.7     | 4.63    | 3.85        | 6.24            | 0                | 100       | 2.39              | 5.2             | 0.010   |
| CSDE1           | cold shock domain containing E1, RNA-binding                                             | Gga.4570.1.S1_at                                      | 12.49  | 12.62  | 13.14  | 13.14  | 11.1       | 11.03      | 13.53   | 13.49   | 13.14       | 11.06           | 100              | 100       | -2.08             | -4.2            | 0.011   |
| YWHAH           | Tyrosine 3-monooxygenase/tryptophan 5-monooxygenase activation protein, beta polypeptide | Gga.4816.1.A1_at                                      | 7.93   | 7.82   | 6.7    | 7.05   | 8.97       | 9.29       | 6.93    | 6.92    | 6.88        | 9.13            | 100              | 100       | 2.26              | 4.8             | 0.011   |
| MSX2            | msh homeobox 2                                                                           | Gga.4977.1.S1_at                                      | 7.4    | 7.47   | 4.39   | 3.98   | 6.49       | 6.58       | 3.95    | 3.93    | 4.18        | 6.54            | 100              | 100       | 2.35              | 5.1             | 0.046   |
| FBP1            | fructose-1,6-bisphosphatase 1                                                            | Gga.5139.1.S1_at                                      | 7.87   | 7.72   | 7.3    | 7.35   | 9.65       | 9.62       | 7.33    | 6.74    | 7.33        | 9.63            | 100              | 100       | 2.31              | 5.0             | 0.000   |
| SEPHS1          | Selenophosphate synthetase 1                                                             | Gga.5144.1.A1_at                                      | 2.74   | 2.85   | 2.75   | 2.79   | 4.79       | 4.9        | 2.75    | 2.69    | 2.77        | 4.85            | 100              | 100       | 2.07              | 4.2             | 0.008   |
| GPD1            | Glycerol-3-phosphate dehydrogenase 1 (soluble)                                           | Gga.5289.1.S1_at                                      | 5.56   | 5.27   | 5.19   | 5.16   | 8.08       | 7.94       | 5.63    | 5.71    | 5.18        | 8.01            | 100              | 100       | 2.83              | 7.1             | 0.011   |
| ---             | ---                                                                                      | Gga.6080.1.A1_at                                      | 3.04   | 3.24   | 4.93   | 5.48   | 2.98       | 2.44       | 5.91    | 5.21    | 2.71        | 100             | 0                | -2.49     | -5.6              | 0.023           |         |
| ---             | ---                                                                                      | Gga.6155.1.S1_at                                      | 9.06   | 9.19   | 9.52   | 9.55   | 7.56       | 7.37       | 9.54    | 9.56    | 9.54        | 7.47            | 100              | 100       | -2.07             | -4.2            | 0.024   |
| RYR1            | ryanodine receptor 1 (skeletal)                                                          | Gga.659.1.S1_at                                       | 6.37   | 6.55   | 7.87   | 7.83   | 5.34       | 5.31       | 7.98    | 8.07    | 7.85        | 5.33            | 100              | 100       | -2.52             | -5.7            | 0.000   |
| ---             | ---                                                                                      | Gga.6808.1.A1_at                                      | 8.61   | 8.58   | 9.6    | 9.65   | 6.55       | 6.89       | 10.49   | 10.53   | 9.63        | 6.72            | 100              | 100       | -2.91             | -7.5            | 0.034   |
| LOC420301       | similar to stem cell antigen 2                                                           | Gga.7004.1.S1_at                                      | 3.55   | 3.51   | 3.55   | 3.71   | 6.17       | 6          | 5.1     | 5.07    | 3.63        | 6.09            | 100              | 100       | 2.45              | 5.5             | 0.002   |
| ---             | ---                                                                                      | Gga.7352                                              |        |        |        |        |            |            |         |         |             |                 |                  |           |                   |                 |         |

|           |                                                         |                         |       |       |       |       |       |       |       |       |       |       |     |     |       |       |       |
|-----------|---------------------------------------------------------|-------------------------|-------|-------|-------|-------|-------|-------|-------|-------|-------|-------|-----|-----|-------|-------|-------|
| TNNI3     | troponin I type 3 (cardiac)                             | Gga.820.1.S1_at         | 12.28 | 12.44 | 13.3  | 13.34 | 11.26 | 11.36 | 13.51 | 13.46 | 13.32 | 11.31 | 100 | 100 | -2.01 | -4.0  | 0.007 |
| ---       | ---                                                     | Gga.840.2.S1_a_at       | 12.39 | 12.49 | 13.3  | 13.28 | 10.96 | 10.93 | 13.87 | 13.84 | 13.29 | 10.95 | 100 | 100 | -2.34 | -5.1  | 0.000 |
| DBN1      | drebrin 1                                               | Gga.9093.1.S1_a_at      | 8.01  | 8.11  | 9.55  | 9.5   | 7.38  | 7.62  | 9.23  | 8.98  | 9.52  | 7.5   | 100 | 100 | -2.02 | -4.1  | 0.030 |
| GIT1      | G protein-coupled receptor kinase interactor 1          | Gga.921.1.S1_at         | 5.99  | 5.55  | 7.43  | 7.07  | 4.78  | 4.28  | 7.65  | 7.66  | 7.25  | 4.53  | 100 | 100 | -2.72 | -6.6  | 0.016 |
| ---       | ---                                                     | Gga.9326.1.S1_at        | 4.19  | 4.44  | 4.4   | 4.38  | 6.67  | 6.48  | 5.5   | 4.48  | 4.39  | 6.58  | 100 | 100 | 2.19  | 4.6   | 0.026 |
| ---       | ---                                                     | Gga.9909.1.S1_at        | 7.43  | 7.52  | 8.72  | 8.74  | 6.36  | 6.34  | 9.19  | 9.29  | 8.73  | 6.35  | 100 | 0   | -2.38 | -5.2  | 0.000 |
| MTCH1     | mitochondrial carrier homolog 1 (C. elegans)            | GgaAffx.117.2.S1_s_at   | 3.7   | 3.7   | 3.71  | 3.69  | 1.74  | 1.63  | 3.93  | 3.71  | 3.7   | 1.68  | 100 | 0   | -2.02 | -4.1  | 0.016 |
| PRPS2     | phosphoribosyl pyrophosphate synthetase 2               | GgaAffx.13038.1.S1_s_at | 4.09  | 4.72  | 2.56  | 2.64  | 6.44  | 6.33  | 3.46  | 2.9   | 2.6   | 6.39  | 0   | 100 | 3.78  | 13.7  | 0.000 |
| KIAA0692  | KIAA0692                                                | GgaAffx.1423.1.S1_at    | 5.94  | 5.75  | 7.24  | 6.78  | 4.54  | 4.87  | 7.39  | 7.07  | 7.01  | 4.71  | 100 | 100 | -2.3  | -4.9  | 0.019 |
| LOC418543 | hypothetical gene supported by BX933825; CR407341       | GgaAffx.20268.1.S1_s_at | 6.73  | 7.04  | 4.98  | 5.25  | 10.23 | 10.23 | 2.34  | 2.67  | 5.12  | 10.23 | 0   | 100 | 5.11  | 34.5  | 0.017 |
| KIAA0430  | KIAA0430                                                | GgaAffx.20448.1.S1_s_at | 5.88  | 6.07  | 5.28  | 5.56  | 3.04  | 2.88  | 5.45  | 5.23  | 5.42  | 2.96  | 100 | 100 | -2.46 | -5.5  | 0.011 |
| ---       | ---                                                     | GgaAffx.20839.1.S1_s_at | 9.84  | 9.79  | 10.62 | 10.55 | 7.22  | 7.11  | 9.77  | 9.55  | 10.59 | 7.17  | 100 | 100 | -3.42 | -10.7 | 0.001 |
| ---       | ---                                                     | GgaAffx.21330.1.S1_at   | 5.43  | 5.45  | 3.93  | 3.67  | 6.3   | 6.23  | 3.63  | 3.61  | 3.8   | 6.27  | 0   | 100 | 2.47  | 5.5   | 0.024 |
| ---       | ---                                                     | GgaAffx.21332.1.S1_s_at | 6.06  | 6.43  | 8.24  | 8.52  | 3.95  | 3.81  | 3.65  | 3.61  | 8.38  | 3.88  | 100 | 0   | -4.5  | -22.6 | 0.005 |
| LINGO3    | leucine rich repeat and Ig domain containing 3          | GgaAffx.22179.1.S1_at   | 8.28  | 8.5   | 9.57  | 9.62  | 7.18  | 7.29  | 9.47  | 9.39  | 9.6   | 7.24  | 100 | 100 | -2.36 | -5.1  | 0.004 |
| DOT1L     | DOT1-like, histone H3 methyltransferase (S. cerevisiae) | GgaAffx.22303.1.S1_at   | 4.58  | 4.4   | 6.39  | 6.32  | 3.25  | 2.97  | 6.64  | 6.95  | 6.36  | 3.11  | 100 | 100 | -3.25 | -9.5  | 0.021 |
| MGA       | MAX gene associated                                     | GgaAffx.22659.1.S1_at   | 3.82  | 3.69  | 4.47  | 4.9   | 2.54  | 2.71  | 4.91  | 4.66  | 4.69  | 2.63  | 100 | 0   | -2.06 | -4.2  | 0.040 |
| PAK4      | p21(CDKN1A)-activated kinase 4                          | GgaAffx.24395.1.S1_at   | 4.94  | 5.41  | 7.2   | 7.22  | 4.74  | 4.48  | 7.76  | 7.67  | 7.21  | 4.61  | 100 | 0   | -2.61 | -6.1  | 0.031 |
| UPF1      | UPF1 regulator of nonsense transcripts homolog (yeast)  | GgaAffx.25781.1.S1_s_at | 8.25  | 7.68  | 8.74  | 8.68  | 6.64  | 6.47  | 9.05  | 9.11  | 8.71  | 6.55  | 100 | 100 | -2.16 | -4.5  | 0.015 |
| LOC768852 | similar to Ac1147                                       | GgaAffx.26780.1.S1_s_at | 1.95  | 1.98  | 1.95  | 1.93  | 6.34  | 6.71  | 1.95  | 1.93  | 1.94  | 6.53  | 0   | 100 | 4.59  | 24.1  | 0.026 |
| TRIM36    | tripartite motif-containing 36                          | GgaAffx.5168.1.S1_at    | 5.58  | 5.47  | 6.4   | 6.57  | 4.55  | 4.39  | 6.58  | 6.8   | 6.48  | 4.47  | 100 | 100 | -2.02 | -4.1  | 0.003 |
| ABCF3     | ATP-binding cassette, sub-family F (GCN20), member 3    | GgaAffx.5344.3.S1_s_at  | 8.04  | 8.09  | 8.6   | 8.73  | 6.59  | 6.46  | 8.61  | 8.65  | 8.66  | 6.53  | 100 | 100 | -2.14 | -4.4  | 0.002 |
| ZNF238    | zinc finger protein 238                                 | GgaAffx.6764.1.S1_at    | 5.54  | 5.68  | 7.93  | 7.9   | 5.52  | 5.73  | 7.99  | 8.01  | 7.92  | 5.63  | 100 | 100 | -2.29 | -4.9  | 0.026 |
| CCNK      | cyclin K                                                | GgaAffx.7070.1.S1_s_at  | 5.05  | 5.07  | 6.46  | 6.45  | 3.62  | 3.57  | 7.17  | 7.48  | 6.46  | 3.59  | 100 | 100 | -2.86 | -7.3  | 0.006 |
| ---       | ---                                                     | GgaAffx.9072.1.A1_at    | 2.61  | 2.74  | 2.57  | 2.55  | 5.46  | 5.25  | 2.55  | 2.53  | 2.56  | 5.36  | 0   | 100 | 2.8   | 7.0   | 0.024 |
| CENTD1    | centaurin, delta 1                                      | GgaAffx.9098.1.S1_at    | 8.14  | 8.14  | 8.8   | 8.5   | 5.01  | 5.14  | 8.38  | 8.28  | 8.65  | 5.07  | 100 | 100 | -3.58 | -12.0 | 0.011 |
| CENTD1    | centaurin, delta 1                                      | GgaAffx.9099.1.S1_at    | 7.52  | 7.41  | 7.42  | 6.86  | 4.57  | 4.94  | 7.19  | 7.37  | 7.14  | 4.76  | 100 | 100 | -2.39 | -5.2  | 0.029 |

Abbreviations: LV, left ventricle; LAL, Left atrial ligation; "a" and "b" for LV samples indicate technical replicates.
