# Supplementary material
Source: PubMed Central journal article supplement (PMC4112186)
Supplement: NIHMS590998-supplement-Supplemental_table_3.pdf [file NIHMS590998-supplement-Supplemental_table_3.pdf]

Supplemental Table 3. Expression for probe sets identified as differentially expressed in right ventricle of ligated hearts versus normal right ventricle.

| Gene Annotation         |                                                                                                                                                     |                         | Expression Data (log2) for all right ventricle samples |        |        |        |            |            |         |         |             |                  | Comparison Data                   |                 |         |       |  |
|-------------------------|-----------------------------------------------------------------------------------------------------------------------------------------------------|-------------------------|--------------------------------------------------------|--------|--------|--------|------------|------------|---------|---------|-------------|------------------|-----------------------------------|-----------------|---------|-------|--|
| Symbol                  | Title                                                                                                                                               | Probe Set ID            | E6_RVa                                                 | E6_RVb | E8_RVa | E8_RVb | E8_RV_LaLa | E8_RV_LaLb | E10_RVa | E10_RVb | Mean (log2) | Present call (%) | Mean Difference (RV-LAL minus RV) | Fold Difference | P value |       |  |
| ---                     | ---                                                                                                                                                 | AY013303.CDS2.S1_s_at   | 7.57                                                   | 7.63   | 7.75   | 7.81   | 4.58       | 4.58       | 8.17    | 8.16    | 7.78        | 100              | 0                                 | -3.2            | -9.2    | 0.006 |  |
| ---                     | ---                                                                                                                                                 | AY013303.CDS3.S1_s_at   | 6.91                                                   | 6.76   | 8.43   | 7.88   | 4.07       | 3.92       | 8.13    | 7.42    | 8.15        | 100              | 0                                 | -4.16           | -17.9   | 0.030 |  |
| SERPIN2                 | serpin peptidase inhibitor, clade B (ovalbumin), member 2                                                                                           | Gga.10034.1.S1_at       | 3.57                                                   | 3.55   | 2.88   | 2.64   | 5.86       | 5.62       | 2.95    | 2.82    | 2.76        | 50               | 100                               | 2.98            | 7.9     | 0.003 |  |
| ---                     | ---                                                                                                                                                 | Gga.10658.1.S1_at       | 8.9                                                    | 8.76   | 6.17   | 6.49   | 8.46       | 8.32       | 5.23    | 4.65    | 6.33        | 100              | 100                               | 2.06            | 4.2     | 0.023 |  |
| FZD7                    | frizzled homolog 7 (Drosophila)                                                                                                                     | Gga.110.1.S2_at         | 4.85                                                   | 4.84   | 2.71   | 2.77   | 4.97       | 4.86       | 2.68    | 2.68    | 2.74        | 0                | 100                               | 2.18            | 4.5     | 0.004 |  |
| KCTD3                   | potassium channel tetramerisation domain containing 3                                                                                               | Gga.11487.1.S1_s_at     | 7.36                                                   | 7.36   | 5.12   | 5.09   | 7.54       | 7.69       | 6.19    | 5.48    | 5.1         | 100              | 100                               | 2.51            | 5.7     | 0.015 |  |
| ---                     | ---                                                                                                                                                 | Gga.11496.1.S1_at       | 2.64                                                   | 2.62   | 2.9    | 2.69   | 6.22       | 5.87       | 2.78    | 2.74    | 2.8         | 100              | 100                               | 3.25            | 9.5     | 0.008 |  |
| ---                     | ---                                                                                                                                                 | Gga.12554.2.S1_a_at     | 7.08                                                   | 6.88   | 7.74   | 7.71   | 5.53       | 5.41       | 8.49    | 8.34    | 7.72        | 100              | 0                                 | -2.25           | -4.8    | 0.010 |  |
| ---                     | ---                                                                                                                                                 | Gga.12631.1.S1_at       | 5.7                                                    | 5.89   | 7.16   | 7.4    | 4.4        | 4.86       | 7.06    | 6.48    | 7.28        | 100              | 100                               | -2.65           | -6.3    | 0.024 |  |
| LRCH2                   | leucine-rich repeats and calponin homology (CH) domain containing 2                                                                                 | Gga.13393.1.S1_s_at     | 6.93                                                   | 6.63   | 4.48   | 4.57   | 7.93       | 7.77       | 3.55    | 3.99    | 4.52        | 100              | 100                               | 3.33            | 10.1    | 0.003 |  |
| TTN                     | Titin                                                                                                                                               | Gga.13915.1.S1_at       | 6.81                                                   | 6.49   | 4.58   | 4.65   | 7.04       | 6.86       | 4.29    | 4.44    | 4.61        | 50               | 100                               | 2.34            | 5.1     | 0.011 |  |
| SYNE2                   | spectrin repeat containing, nuclear envelope 2                                                                                                      | Gga.15111.1.S1_s_at     | 5.02                                                   | 5.09   | 3      | 2.88   | 4.99       | 4.95       | 2.84    | 3.03    | 2.94        | 100              | 100                               | 2.03            | 4.1     | 0.009 |  |
| GNG11                   | guanine nucleotide binding protein (G protein), gamma 11                                                                                            | Gga.15320.1.S1_at       | 7.03                                                   | 7.23   | 6.52   | 6.96   | 9.06       | 8.79       | 5.78    | 5.6     | 6.74        | 100              | 100                               | 2.18            | 4.5     | 0.023 |  |
| ---                     | ---                                                                                                                                                 | Gga.15807.1.S1_at       | 8.19                                                   | 8.09   | 6.24   | 6.3    | 8.43       | 8.17       | 6.25    | 6.54    | 6.27        | 100              | 100                               | 2.03            | 4.1     | 0.035 |  |
| YTHDC1                  | YTH domain containing 1                                                                                                                             | Gga.16032.1.A1_at       | 2.64                                                   | 2.64   | 5.6    | 5.63   | 2.62       | 2.64       | 4.38    | 4.85    | 5.62        | 100              | 100                               | -2.99           | -7.9    | 0.000 |  |
| GLUD1                   | glutamate dehydrogenase 1                                                                                                                           | Gga.16450.1.S1_at       | 7.65                                                   | 7.66   | 4.23   | 4.49   | 7.58       | 7.48       | 4.45    | 4.21    | 4.36        | 100              | 100                               | 3.17            | 9.0     | 0.011 |  |
| ---                     | ---                                                                                                                                                 | Gga.16858.2.S1_a_at     | 11                                                     | 11.07  | 9.23   | 9.29   | 11.66      | 11.76      | 8.89    | 8.72    | 9.26        | 100              | 100                               | 2.45            | 5.5     | 0.002 |  |
| SYNE2                   | spectrin repeat containing, nuclear envelope 2                                                                                                      | Gga.17077.1.S1_s_at     | 8.32                                                   | 8.12   | 4.84   | 4.91   | 8.6        | 9.03       | 4.6     | 4.97    | 4.88        | 0                | 100                               | 3.94            | 15.3    | 0.031 |  |
| GLIS2                   | GLIS family zinc finger 2                                                                                                                           | Gga.177.1.S1_at         | 3.84                                                   | 3.71   | 2.26   | 2.23   | 4.55       | 4.25       | 2.23    | 2.24    | 2.24        | 4.4              | 100                               | 2.16            | 4.5     | 0.042 |  |
| HERC2                   | hect domain and RLD 2                                                                                                                               | Gga.17764.1.S1_s_at     | 8.26                                                   | 7.99   | 6.75   | 6.39   | 8.82       | 8.87       | 6.19    | 5.95    | 6.57        | 100              | 100                               | 2.28            | 4.9     | 0.046 |  |
| BCKDHA                  | branched chain keto acid dehydrogenase E1, alpha polypeptide                                                                                        | Gga.188.1.S1_at         | 7.63                                                   | 7.35   | 9.1    | 8.96   | 6.88       | 6.54       | 9.6     | 9.5     | 9.03        | 100              | 0                                 | -2.32           | -5.0    | 0.023 |  |
| ACOT9                   | acyl-CoA thioesterase 9                                                                                                                             | Gga.19408.1.S1_s_at     | 8.7                                                    | 8.91   | 9.15   | 9.29   | 6.8        | 6.32       | 7.94    | 8.1     | 9.22        | 100              | 100                               | -2.66           | -6.3    | 0.042 |  |
| ---                     | ---                                                                                                                                                 | Gga.19442.1.S1_at       | 7.4                                                    | 7.73   | 8.8    | 8.82   | 6.39       | 6.49       | 9.14    | 8.93    | 8.81        | 100              | 100                               | -2.37           | -5.2    | 0.012 |  |
| TTN                     | titin                                                                                                                                               | Gga.19481.6.S1_at       | 9.29                                                   | 9.07   | 6.87   | 6.75   | 10.22      | 10.34      | 6.38    | 6.46    | 6.81        | 100              | 100                               | 3.47            | 11.1    | 0.001 |  |
| ---                     | ---                                                                                                                                                 | Gga.19967.1.S1_at       | 7.73                                                   | 7.9    | 8.63   | 8.73   | 6.62       | 6.58       | 9.36    | 8.68    | 6.6         | 100              | 100                               | -2.08           | -4.2    | 0.009 |  |
| GRB2                    | growth factor receptor-bound protein 2                                                                                                              | Gga.2170.1.S1_at        | 8.93                                                   | 9.2    | 6.47   | 6.12   | 8.48       | 8.6        | 6.58    | 6.85    | 6.29        | 50               | 100                               | 2.25            | 4.8     | 0.032 |  |
| LMO4                    | LIM domain only 4                                                                                                                                   | Gga.2310.1.S1_at        | 8.23                                                   | 8.24   | 6.1    | 6.5    | 9.02       | 8.87       | 6.28    | 6.08    | 6.3         | 100              | 100                               | 2.65            | 6.3     | 0.027 |  |
| ---                     | ---                                                                                                                                                 | Gga.2341.2.S1_at        | 4.12                                                   | 3.94   | 5.99   | 6.18   | 3.78       | 3.66       | 5.88    | 5.63    | 6.08        | 100              | 100                               | -2.36           | -5.1    | 0.005 |  |
| ---                     | ---                                                                                                                                                 | Gga.2501.1.A1_at        | 4.92                                                   | 4.73   | 7.35   | 7.51   | 5.09       | 5.29       | 8.31    | 8.32    | 7.43        | 100              | 100                               | -2.24           | -4.7    | 0.004 |  |
| NOV                     | nephroblastoma overexpressed gene                                                                                                                   | Gga.2587.1.S1_at        | 5.02                                                   | 5.05   | 6.98   | 6.79   | 9.48       | 9.45       | 6.68    | 6.45    | 6.88        | 100              | 100                               | 2.59            | 6.0     | 0.021 |  |
| ACVR1                   | activin A receptor, type I                                                                                                                          | Gga.2875.2.S1_a_at      | 8.06                                                   | 8.02   | 9.02   | 9.04   | 6.49       | 6.39       | 9.18    | 9.1     | 9.03        | 100              | 100                               | -2.59           | -6.0    | 0.009 |  |
| HOXA3                   | homeobox A3                                                                                                                                         | Gga.3381.1.S2_at        | 5.48                                                   | 5.73   | 4.2    | 3.97   | 6.32       | 6.19       | 3.21    | 3.25    | 4.08        | 100              | 100                               | 2.17            | 4.5     | 0.008 |  |
| SERPINB10               | serpin peptidase inhibitor, clade B (ovalbumin), member 10                                                                                          | Gga.415.1.S1_at         | 1.47                                                   | 1.49   | 1.98   | 2.1    | 4.53       | 4.9        | 3.73    | 3.82    | 2.04        | 100              | 100                               | 2.68            | 6.4     | 0.026 |  |
| ALB                     | albumin                                                                                                                                             | Gga.4510.1.S1_a_at      | 3.89                                                   | 3.91   | 4.79   | 4.34   | 8.78       | 8.52       | 6.55    | 6.55    | 4.56        | 100              | 100                               | 4.09            | 17.0    | 0.010 |  |
| HRSPT12                 | heat-responsive protein 12                                                                                                                          | Gga.4700.1.S1_a_at      | 7.46                                                   | 7.39   | 5.57   | 5.1    | 7.77       | 7.57       | 6.57    | 6.76    | 5.34        | 100              | 100                               | 2.34            | 5.1     | 0.034 |  |
| LOC395914               | lymphotactin                                                                                                                                        | Gga.542.1.S1_at         | 7.14                                                   | 6.96   | 3.56   | 3.71   | 5.65       | 5.71       | 7.58    | 7.24    | 3.63        | 100              | 100                               | 2.05            | 4.1     | 0.008 |  |
| CABC1                   | chaperone, ABC1 activity of bc1 complex homolog (S. pombe)                                                                                          | Gga.6127.2.S1_a_at      | 8.22                                                   | 8.2    | 9.32   | 9.37   | 7.34       | 7.23       | 9.81    | 9.53    | 9.35        | 100              | 100                               | -2.06           | -4.2    | 0.005 |  |
| PAK4                    | p21(CDKN1A)-activated kinase 4                                                                                                                      | Gga.6761.1.S1_at        | 5.77                                                   | 5.91   | 7.55   | 7.52   | 4.39       | 4.35       | 8.2     | 8.32    | 7.53        | 100              | 100                               | -3.16           | -8.9    | 0.000 |  |
| ---                     | ---                                                                                                                                                 | Gga.6808.1.A1_at        | 8.16                                                   | 7.9    | 8.85   | 9.25   | 6.86       | 6.56       | 9.54    | 9.37    | 9.05        | 100              | 100                               | -2.35           | -5.1    | 0.014 |  |
| LOC420301               | similar to stem cell antigen 2                                                                                                                      | Gga.7004.1.S1_at        | 4.89                                                   | 5.17   | 4.07   | 4.29   | 8.09       | 7.83       | 7.45    | 7.08    | 4.18        | 100              | 100                               | 3.78            | 13.7    | 0.002 |  |
| NDUFA12                 | NADH dehydrogenase (ubiquinone) 1 alpha subcomplex, 12                                                                                              | Gga.7183.1.S1_at        | 4.19                                                   | 3.94   | 2.98   | 2.59   | 5.65       | 5.38       | 4.21    | 3.94    | 2.79        | 100              | 100                               | 2.73            | 6.6     | 0.012 |  |
| LOC396260               | mature avidin                                                                                                                                       | Gga.729.1.S1_at         | 2.33                                                   | 2.29   | 2.28   | 2.28   | 7.54       | 7.3        | 2.3     | 2.32    | 2.28        | 0                | 100                               | 5.14            | 35.3    | 0.015 |  |
| ---                     | ---                                                                                                                                                 | Gga.8578.1.S1_at        | 5.87                                                   | 5.72   | 3.42   | 3.7    | 6.3        | 6.15       | 2.34    | 2.78    | 3.56        | 100              | 100                               | 2.66            | 6.3     | 0.010 |  |
| ---                     | ---                                                                                                                                                 | Gga.867.1.S1_at         | 9.91                                                   | 9.96   | 9.9    | 9.87   | 7.62       | 7.53       | 9.12    | 9.09    | 9.88        | 100              | 100                               | -2.31           | -5.0    | 0.006 |  |
| GIT1                    | G protein-coupled receptor kinase interactor 1                                                                                                      | Gga.921.1.S1_at         | 5.57                                                   | 6.26   | 6.58   | 6.83   | 3.89       | 3.73       | 6.92    | 7.08    | 6.7         | 100              | 100                               | -2.89           | -7.4    | 0.006 |  |
| ATRX                    | alpha thalassemia/mental retardation syndrome X-linked                                                                                              | Gga.9668.1.S1_s_at      | 8.45                                                   | 8.35   | 5.62   | 5.87   | 8.37       | 8.38       | 5.16    | 5.26    | 5.75        | 100              | 100                               | 2.63            | 6.2     | 0.030 |  |
| TSPAN7                  | tetraspanin 7                                                                                                                                       | Gga.9700.4.S1_a_at      | 8.43                                                   | 8.61   | 10.16  | 10.18  | 7.98       | 7.9        | 10.27   | 10.33   | 10.17       | 100              | 100                               | -2.23           | -4.7    | 0.007 |  |
| UMPS                    | uridine monophosphate synthetase (orotate phosphoribosyl transferase and orotidine-5'-decarboxylase)                                                | GgaAffx.11425.1.S1_at   | 7.53                                                   | 7.49   | 6.81   | 6.35   | 8.83       | 9.02       | 8.21    | 8.11    | 6.58        | 0                | 100                               | 2.35            | 5.1     | 0.036 |  |
| KIAA0692                | KIAA0692                                                                                                                                            | GgaAffx.1423.1.S1_at    | 4.82                                                   | 5.5    | 6.83   | 6.6    | 4.73       | 4.24       | 6.78    | 6.99    | 6.72        | 100              | 100                               | -2.23           | -4.7    | 0.038 |  |
| ENPP1                   | ectonucleotide pyrophosphatase/phosphodiesterase 1                                                                                                  | GgaAffx.1852.2.S1_s_at  | 4.77                                                   | 5.33   | 7.52   | 7.55   | 5.31       | 5.16       | 7.77    | 7.99    | 7.53        | 100              | 100                               | -2.3            | -4.9    | 0.018 |  |
| LOC418543               | hypothetical gene supported by BX933825; CR407341                                                                                                   | GgaAffx.20268.1.S1_s_at | 11.64                                                  | 11.66  | 7.67   | 7.84   | 10.98      | 10.84      | 4.31    | 4.33    | 7.76        | 100              | 100                               | 3.16            | 8.9     | 0.002 |  |
| MGA                     | MAX gene associated                                                                                                                                 | GgaAffx.22659.1.S1_at   | 3.19                                                   | 3.59   | 4.5    | 4.42   | 2.3        | 2.59       | 4.63    | 4.47    | 4.46        | 0                | 100                               | -2.01           | -4.0    | 0.033 |  |
| KLHL23                  | kelch-like 23 (Drosophila)                                                                                                                          | GgaAffx.23021.2.S1_s_at | 7.26                                                   | 6.6    | 6.65   | 6.54   | 8.73       | 8.63       | 7.05    | 6.92    | 6.59        | 100              | 100                               | 2.09            | 4.3     | 0.001 |  |
| LOC423125 /// LOC768811 | similar to scavenger receptor cysteine-rich type 1 protein CD163c-alpha /// similar to scavenger receptor cysteine-rich type 1 protein CD163c-alpha | GgaAffx.23339.2.S1_s_at | 6.43                                                   | 6.1    | 5.38   | 5.55   | 7.7        | 7.34       | 6.32    | 5.64    | 5.47        | 50               | 100                               | 2.05            | 4.1     | 0.025 |  |
| FAM44A                  | family with sequence similarity 44, member A                                                                                                        | GgaAffx.24441.1.S1_s_at | 8.35                                                   | 8.71   | 5.43   | 5.72   | 8.37       | 8.73       | 4.77    | 4.83    | 5.57        | 100              | 100                               | 2.98            | 7.9     | 0.007 |  |
| ---                     | ---                                                                                                                                                 | GgaAffx.24621.1.S1_at   | 7.85                                                   | 7.69   | 8.5    | 8.54   | 6.14       | 6.03       | 8.9     | 8.61    | 8.52        | 100              | 100                               | -2.44           | -5.4    | 0.008 |  |

|         |                                                       |                        |      |      |      |      |      |      |      |      |      |      |     |     |       |       |       |
|---------|-------------------------------------------------------|------------------------|------|------|------|------|------|------|------|------|------|------|-----|-----|-------|-------|-------|
| FBXO3   | F-box protein 3                                       | GgaAffx.4835.1.S1_at   | 5.49 | 5.39 | 3.77 | 4.38 | 7.83 | 8.15 | 3.82 | 3.63 | 4.08 | 7.99 | 100 | 100 | 3.92  | 15.1  | 0.019 |
| STEAP4  | STEAP family member 4                                 | GgaAffx.5682.1.S1_at   | 8.47 | 8.37 | 4.95 | 5.45 | 7.73 | 7.39 | 3.18 | 3.5  | 5.2  | 7.56 | 100 | 100 | 2.36  | 5.1   | 0.023 |
| STEAP4  | STEAP family member 4                                 | GgaAffx.5682.2.S1_s_at | 7.52 | 7.78 | 4.35 | 4.2  | 7.38 | 6.96 | 2.4  | 2.35 | 4.28 | 7.17 | 100 | 100 | 2.89  | 7.4   | 0.028 |
| AKAP9   | A kinase (PRKA) anchor protein (votiao) 9             | GgaAffx.5870.1.S1_at   | 5.78 | 6.15 | 3.25 | 3.22 | 6.2  | 5.88 | 3.29 | 3.37 | 3.24 | 6.04 | 50  | 100 | 2.8   | 7.0   | 0.035 |
| MMRN1   | multimerin 1                                          | GgaAffx.6568.1.S1_at   | 2.14 | 2.14 | 5.35 | 5.46 | 3.17 | 3.41 | 7.04 | 6.8  | 5.41 | 3.29 | 100 | 50  | -2.11 | -4.3  | 0.014 |
| ZNF238  | zinc finger protein 238                               | GgaAffx.6764.1.S1_at   | 7.82 | 7.78 | 7.95 | 8    | 5.38 | 5.37 | 7.95 | 7.91 | 7.97 | 5.38 | 100 | 100 | -2.59 | -6.0  | 0.004 |
| CCNK    | cyclin K                                              | GgaAffx.7070.1.S1_s_at | 3.96 | 4.12 | 5.95 | 5.77 | 3.37 | 2.93 | 6.45 | 6.46 | 5.86 | 3.15 | 100 | 100 | -2.71 | -6.5  | 0.029 |
| SLC39A8 | solute carrier family 39 (zinc transporter), member 8 | GgaAffx.7796.1.S1_at   | 7.84 | 7.75 | 4.07 | 4.29 | 6.85 | 6.84 | 3    | 3.72 | 4.18 | 6.84 | 100 | 100 | 2.66  | 6.3   | 0.026 |
| SUV39H2 | suppressor of variegation 3-9 homolog 2 (Drosophila)  | GgaAffx.8847.1.S1_at   | 6.11 | 6.09 | 3.55 | 4.01 | 6.21 | 5.89 | 4.25 | 2.92 | 3.78 | 6.05 | 0   | 100 | 2.27  | 4.8   | 0.021 |
| CENTD1  | centaurin, delta 1                                    | GgaAffx.9098.1.S1_at   | 8.01 | 8.17 | 7.58 | 7.64 | 4.25 | 3.94 | 6.4  | 6.64 | 7.61 | 4.1  | 100 | 100 | -3.51 | -11.4 | 0.024 |

Abbreviations: RV, left ventricle; LAL, Left atrial ligation; "a" and "b" for RV samples indicate technical replicates.
